# Supplementary material for: Coordinated hedgehog signaling induces new hair follicles in adult skin
Source: eLife. 2020 Mar 17;9:e46756. doi: 10.7554/eLife.46756 (PMC7077985; doi:10.7554/eLife.46756)
Supplement: Figure 2—source data 1. — Data are grouped according to hair type and mouse genotype. [file elife-46756-fig2-data1.xlsx]

## Sheet: Figure 2 - Source Data 1
Figure 2 - Source Data 1. Quantification of hair width and length. Data grouped according to hair type and mouse genotype.
Old Zig-zag hairs								De Novo hairs					Summary count
Ptch1(fl/wt)				Ptch1(fl/fl)				Ptch1(fl/fl)				Old Zig-zag Ptch1(fl/wt)	437
Sample ID	Length (um)	Width (um)		Sample ID	Length (um)	Width (um)		Sample ID	Length (um)	Width (um)		Old Zig-zag Ptch1(fl/fl)	314
MK168_4_SL4	363.168	8.085		MK168_8_SL8	249.297	8.186		MK168_8_SL8	177.971	5.823		De Novo Ptch1(fl/fl)	34
MK168_4_SL4	364.486	14.139		MK168_1_SL5	387.705	7.307		MK168_1_SL5	102.922	3.52		Total	785
MK168_4_SL4	334.973	14.575		MK168_1_SL5	416.481	9.65		MK168_1_SL5	134.055	6.026
MK168_4_SL4	327.259	11.846		MK168_1_SL5	349.002	7.65		MK168_1_SL5	122.182	4.622
MK168_4_SL4	326.518	11.092		MK168_1_SL5	334.388	8.19		MK168_1_SL5	153.07	5.39
MK168_4_SL4	306.162	9.039		MK168_1_SL5	349.002	8.37		MK168_1_SL5	174.402	6.729
MK168_4_SL4	325.066	13.655		MK168_1_SL5	333.705	10.209		MK168_8_SL7	81.561	3.333
MK168_4_SL4	344.186	14.706		MK168_1_SL5	294.823	9.804		MK168_8_SL8	191.574	11.645
MK168_4_SL4	350.516	18.236		MK168_1_SL5	374.199	9.426		MK168_8_SL7	136.846	6.773
MK168_4_SL4	334.923	13.934		MK168_1_SL5	367.425	8.793		MK168_8_SL7	81.071	2.981
MK168_4_SL4	308.068	13.153		MK168_1_SL5	326.042	7.87		MK168_8_SL7	175.77	5.011
MK168_4_SL4	315.084	13.335		MK168_1_SL5	393.789	15.047		MK168_8_SL7	133.072	6.083
MK168_4_SL4	342.689	9.705		MK168_1_SL5	360.263	9.289		MK168_8_SL8	118.22	7.146
MK168_4_SL4	339.863	6.577		MK168_1_SL5	393.082	9.243		MK168_1_SL23	75.925	3.894
MK168_4_SL4	343.893	6.577		MK168_1_SL5	300.725	8.793		MK168_1_SL24	95.654	4.521
MK168_4_SL4	324.902	14.706		MK168_1_SL5	291.756	7.87		MK168_1_SL24	95.622	3.671
MK168_4_SL4	364.479	14.139		MK168_1_SL5	275.017	11.13		MK168_1_SL24	94.778	4.459
MK168_4_SL4	391.903	9.039		MK168_1_SL5	304.91	8.89		MK168_1_SL23	108.602	4.472
MK168_4_SL4	312.479	6.278		MK168_1_SL5	303.068	8.37		MK168_1_SL23	157.059	4.237
MK168_4_SL4	286.335	9.039		MK168_1_SL5	295.319	10.819		MK168_1_SL23	238.845	6.024
MK168_4_SL4	332.952	10.605		MK168_1_SL5	225.159	7.395		MK168_1_SL23	190.611	6.237
MK168_4_SL4	311.828	7.657		MK168_1_SL5	338.313	7.978		MK168_1_SL23	140.314	4.245
MK168_4_SL4	384.015	10.422		MK168_1_SL5	243.244	9.955		MK168_1_SL23	120.025	5.473
MK168_4_SL4	328.051	15.96		MK168_1_SL5	257.812	8.37		MK168_1_SL23	163.821	5.288
MK168_4_SL4	372.983	15.314		MK168_1_SL5	189.702	10.819		MK168_1_SL23	148.414	4.417
MK168_4_SL4	355.722	13.19		MK168_1_SL5	184.376	7.039		MK168_1_SL23	116.56	4.459
MK168_4_SL4	323.002	12.745		MK168_1_SL5	272.813	12.28		MK168_1_SL23	91.234	4.515
MK168_4_SL4	338.803	10.422		MK168_1_SL5	274.436	8.522		MK168_1_SL23	142.537	5.063
MK168_4_SL4	335.291	10.422		MK168_1_SL5	258.073	9.716		MK154_2_SL28	137.447	5.011
MK168_4_SL4	378.351	11.178		MK168_1_SL5	328.947	12.973		MK154_2_SL30	159.228	3.236
MK168_4_SL4	362.087	12.555		MK168_1_SL5	398.924	9.243		MK154_2_SL30	139.511	3.615
MK168_4_SL4	373.133	11.805		MK168_1_SL5	379.871	9.716		MK154_2_SL30	141.354	3.201
MK168_4_SL4	359.11	12.478		MK168_1_SL5	327.424	11.563		MK154_2_SL28	178.909	3.9
MK168_4_SL4	308.052	7.904		MK168_1_SL5	428.458	11.783		MK154_2_SL30	87.322	9.908
MK168_4_SL4	349.109	12.478		MK168_1_SL5	312.049	9.716
MK168_4_SL4	327.634	15.808		MK168_1_SL5	313.634	8.522
MK168_4_SL4	270.453	9.039		MK168_1_SL5	387.635	12.052
MK168_4_SL4	331.061	7.07		MK168_1_SL5	369.006	7.87
MK168_4_SL4	341.836	11.178		MK168_1_SL5	412.089	11.783
MK168_4_SL4	320.198	8.434		MK168_1_SL5	400.186	7.87
MK168_4_SL4	404.451	15.501		MK168_1_SL5	401.193	11.692
MK168_4_SL4	366.305	6.278		MK168_1_SL5	314.061	8.37
MK168_4_SL4	351.002	7.904		MK168_1_SL5	287.54	8.769
MK168_4_SL4	342.359	15.251		MK168_1_SL5	304.216	9.08
MK168_4_SL4	337.814	13.335		MK168_1_SL5	314.273	10.334
MK168_4_SL4	334.842	10.422		MK168_1_SL5	393.05	9.998
MK168_4_SL4	381.871	11.092		MK168_1_SL5	410.887	13.655
MK168_4_SL4	410.795	11.092		MK168_1_SL5	263.076	11.475
MK168_4_SL4	327.87	11.805		MK168_1_SL5	293.935	14.139
MK168_4_SL4	358.545	17.345		MK168_1_SL5	257.819	10.422
MK168_4_SL4	329.553	12.555		MK168_1_SL5	280.846	7.978
MK168_4_SL4	312.825	15.314		MK168_1_SL5	342.319	8.37
MK168_4_SL4	502.272	7.657		MK168_1_SL5	307.107	9.039
MK168_4_SL4	444.079	11.967		MK168_1_SL5	332.324	11.433
MK168_4_SL4	366.563	10.422		MK168_1_SL5	292.033	9.656
MK168_4_SL4	342.596	9.804		MK168_1_SL5	410.18	11.805
MK168_4_SL4	420.546	8.728		MK168_1_SL5	354.117	9.804
MK168_4_SL4	443.188	9.039		MK168_1_SL5	392.495	10.422
MK168_4_SL4	384.529	9.668		MK168_1_SL5	317.096	13.934
MK168_4_SL4	342.031	10.605		MK168_1_SL5	327.904	10.961
MK168_4_SL4	415.402	12.526		MK168_1_SL5	306.919	12.127
MK168_4_SL4	371.46	9.518		MK168_1_SL5	290.133	12.745
MK168_4_SL4	343.146	11.486		MK168_1_SL5	273.354	12.895
MK168_4_SL4	336.777	8.999		MK168_1_SL5	351.44	13.335
MK168_4_SL4	355.043	10.094		MK168_1_SL6	318.303	7.307
MK168_4_SL4	329.057	10.341		MK168_1_SL6	280.02	7.951
MK168_4_SL4	309.298	4.65		MK168_1_SL6	348.471	8.19
MK168_4_SL4	340.256	7.904		MK168_1_SL6	355.909	7.978
MK168_4_SL4	394.666	11.016		MK168_1_SL6	351.686	8.89
MK168_4_SL4	330.782	11.967		MK168_1_SL6	275.95	7.395
MK168_4_SL4	351.984	10.106		MK168_1_SL6	318.711	7.87
MK168_4_SL4	335.532	8.837		MK168_1_SL6	339.973	6.166
MK168_4_SL4	316.194	6.595		MK168_1_SL6	325.491	11.998
MK168_4_SL4	358.441	8.837		MK168_1_SL6	276.27	9.426
MK168_4_SL4	338.53	10.795		MK168_1_SL6	354.637	7.978
MK168_4_SL4	387.988	9.249		MK168_1_SL6	388.35	7.307
MK168_4_SL4	364.661	8.837		MK168_1_SL6	314.088	10.829
MK168_4_SL4	375.109	9.012		MK168_1_SL6	379.174	10.961
MK168_4_SL4	397.31	13.38		MK168_1_SL6	323.443	8.878
MK168_4_SL4	326.636	7.353		MK168_1_SL6	349.399	9.656
MK168_4_SL4	362.377	7.657		MK168_1_SL6	280.517	10.961
MK168_4_SL4	422.13	9.039		MK168_1_SL6	291.125	7.904
MK168_4_SL4	382.113	12.745		MK168_1_SL6	271.632	9.039
MK168_4_SL4	347.634	9.804		MK168_1_SL6	287.883	11.927
MK168_4_SL4	396.623	9.039		MK168_1_SL6	250.969	11.805
MK168_4_SL4	372.046	12.895		MK168_1_SL6	345.838	11.805
MK168_4_SL4	354.41	10.961		MK168_1_SL6	331.975	8.878
MK168_4_SL4	362.944	7.843		MK168_1_SL6	284.702	12.127
MK168_4_SL4	390.296	9.998		MK168_1_SL6	254.322	10.829
MK168_4_SL4	356.923	10.784		MK168_1_SL6	318.76	9.853
MK168_4_SL4	335.346	10.961		MK168_1_SL6	298.175	9.656
MK168_4_SL4	347.58	9.998		MK168_1_SL6	310.823	13.655
MK168_4_SL4	294.844	10.236		MK168_1_SL6	352.654	11.765
MK168_4_SL4	359.531	11.433		MK168_1_SL6	360.929	10.961
MK168_4_SL4	360.382	8.434		MK168_1_SL6	334.462	8.878
MK168_4_SL4	335.815	11.805		MK168_1_SL6	254.298	8.878
MK168_4_SL4	490.264	13.865		MK168_1_SL6	255.145	10.559
MK168_4_SL4	448.978	9.249		MK168_1_SL6	312.862	10.094
MK168_4_SL4	290.032	11.805		MK168_1_SL6	314.759	9.705
MK168_4_SL4	241.243	10.795		MK168_1_SL6	288.925	14.275
MK168_4_SL4	383.248	7.626		MK168_1_SL6	361.572	12.783
MK168_4_SL4	366.929	8.728		MK168_1_SL6	260.646	13.655
MK168_4_SL4	318.225	8.04		MK168_1_SL6	279.028	9.804
MK168_4_SL4	364.762	14.69		MK168_1_SL6	335.02	14.139
MK168_4_SL4	337.12	12.107		MK168_1_SL6	324.464	9.656
MK168_4_SL4	390.162	13.804		MK168_1_SL6	313.652	9.249
MK168_4_SL4	395.387	11.652		MK168_1_SL6	269.624	9.301
MK168_4_SL4	358.924	12.498		MK168_1_SL6	377.257	13.153
MK168_4_SL4	289.64	7.98		MK168_8_SL1	359.453	10.077
MK168_4_SL4	343.865	12.498		MK168_8_SL1	331.866	12.226
MK168_4_SL4	333.652	6.828		MK168_8_SL1	387.903	10.709
MK168_4_SL4	382.746	10.306		MK168_8_SL1	418.225	14.105
MK168_4_SL4	378.617	11.2		MK168_8_SL1	393	13.622
MK168_4_SL4	382.256	11.178		MK168_8_SL1	355.658	9.538
MK168_4_SL4	388.486	8.085		MK168_8_SL1	377.218	14.617
MK168_4_SL4	329.197	11.059		MK168_8_SL1	304.451	13.967
MK168_4_SL4	298.401	7.751		MK168_8_SL1	275.974	7.766
MK168_4_SL4	371.269	9.631		MK168_8_SL1	306.774	7.632
MK168_4_SL4	294.381	7.483		MK168_8_SL1	313.995	5.788
MK168_4_SL4	284.081	9.21		MK168_8_SL1	422.443	9.333
MK168_4_SL4	297.345	8.319		MK168_8_SL1	388.815	11.134
MK168_4_SL4	348.048	10.058		MK168_8_SL1	380.797	10.935
MK168_4_SL4	384.477	8.837		MK168_8_SL1	332.031	11.272
MK168_4_SL4	309.557	9.416		MK168_8_SL1	337.505	14.861
MK168_4_SL4	350.223	9.865		MK168_8_SL1	410.933	16.536
MK168_4_SL4	283.912	9.705		MK168_8_SL1	477.318	17.534
MK168_4_SL4	337.814	13.335		MK168_8_SL1	215.477	17.622
MK168_4_SL4	334.842	10.422		MK168_8_SL1	396.789	14.931
MK168_4_SL4	381.871	11.092		MK168_8_SL1	365.943	10.935
MK168_4_SL4	410.795	11.092		MK168_8_SL1	313.559	9.578
MK168_4_SL4	327.87	11.805		MK168_8_SL1	422.016	17.826
MK168_4_SL4	358.545	17.345		MK168_8_SL1	366.075	15.213
MK168_4_SL4	329.553	12.555		MK168_8_SL1	472.385	10.982
MK168_4_SL4	312.825	15.314		MK168_8_SL1	481.84	13.641
MK168_4_SL4	502.272	7.657		MK168_8_SL1	389.59	9.765
MK168_4_SL4	444.079	11.967		MK168_8_SL1	425.3	15.465
MK168_4_SL4	366.563	10.422		MK168_8_SL1	390.593	7.269
MK168_4_SL4	342.596	9.804		MK168_8_SL1	354.503	15.892
MK168_4_SL4	451.603	17.373		MK168_8_SL1	373.549	16.898
MK168_4_SL4	447.25	12.401		MK168_8_SL1	558.61	15.23
MK168_4_SL4	402.496	15.346		MK168_8_SL1	522.99	15.068
MK168_4_SL4	398.214	15.346		MK168_8_SL1	385.677	14.999
MK168_4_SL4	443.61	9.039		MK168_8_SL1	430.555	14.999
MK168_4_SL4	429.702	9.716		MK168_8_SL1	415.216	10.115
MK168_4_SL4	393.334	7.07		MK168_8_SL1	349.158	13.052
MK168_4_SL4	422.366	15.591		MK168_8_SL1	433.482	12.067
MK168_4_SL4	431.85	17.403		MK168_8_SL1	416.537	10.661
MK168_4_SL4	398.063	13.458		MK168_8_SL1	413.6	15.531
MK168_4_SL4	393.432	15.808		MK168_8_SL1	424.78	16.277
MK168_4_SL4	389.956	17.156		MK168_8_SL8	307.595	12.401
MK168_4_SL4	332.698	15.244		MK168_8_SL8	300.231	10.605
MK168_4_SL4	356.653	14.468		MK168_8_SL8	275.785	9.804
MK168_4_SL4	374.945	11.433		MK168_8_SL8	337.261	12.783
MK168_4_SL4	400.769	13.458		MK168_8_SL8	353.057	9.804
MK168_4_SL4	383.268	10.779		MK168_8_SL8	339.759	10.605
MK168_4_SL4	392.284	10.334		MK168_8_SL8	371.32	12.783
MK168_4_SL4	391.16	11.13		MK168_8_SL8	337.557	11.967
MK168_4_SL4	392.132	11.13		MK168_8_SL8	249.384	14.706
MK168_4_SL4	378.972	10.458		MK168_8_SL8	228.236	12.284
MK168_4_SL4	361.402	11.927		MK168_8_SL8	353.726	17.15
MK168_4_SL4	441.081	14.438		MK168_8_SL8	341.245	14.475
MK168_4_SL4	507.423	13.741		MK168_8_SL8	282.15	8.434
MK168_4_SL4	442.588	18.966		MK168_8_SL8	299.801	9.804
MK168_4_SL4	465.107	19.223		MK168_8_SL8	245.027	11.178
MK168_4_SL4	389.367	13.137		MK168_8_SL8	239.194	9.249
MK168_4_SL4	369.272	10.478		MK168_8_SL8	350.323	16.867
MK168_4_SL4	459.578	16.34		MK168_8_SL8	331.929	14.037
MK168_4_SL4	495.486	13.023		MK168_8_SL8	284.957	10.422
MK168_4_SL4	375.453	10.147		MK168_8_SL8	256.275	10.422
MK168_4_SL4	370.316	13.331		MK168_8_SL8	326.418	14.139
MK168_4_SL4	360.515	12.435		MK168_8_SL8	361.572	10.422
MK168_4_SL4	507.126	18.999		MK168_8_SL8	263.49	13.153
MK168_4_SL4	452.285	14.379		MK168_8_SL8	336.927	11.178
MK168_4_SL4	370.674	12.623		MK168_8_SL8	369.655	11.178
MK168_4_SL4	352.666	12.874		MK168_8_SL8	407.891	13.19
MK168_4_SL4	377.464	7.65		MK168_8_SL8	227.535	13.335
MK168_4_SL4	345.203	7.07		MK168_8_SL8	294.668	13.335
MK168_4_SL4	432.982	8.89		MK168_8_SL8	305.532	13.335
MK168_4_SL4	421.602	12.052		MK168_8_SL8	337.944	12.745
MK168_4_SL4	358.604	11.692		MK168_8_SL8	350.748	11.846
MK168_4_SL4	361.092	10.334		MK168_8_SL8	334.591	15.22
MK168_4_SL4	440.867	15.033		MK168_8_SL8	367.485	15.346
MK168_4_SL4	406.922	9.358		MK168_8_SL8	344.964	12.555
MK168_4_SL4	537.311	12.016		MK168_8_SL8	295.1	16.753
MK168_4_SL4	421.275	12.418		MK168_8_SL8	287.548	11.178
MK168_4_SL4	400.139	9.826		MK168_8_SL8	348.049	18.236
MK168_4_SL4	380.759	13.788		MK168_8_SL8	309.632	14.037
MK168_4_SL4	426.994	15.244		MK168_8_SL8	335.215	15.808
MK168_4_SL4	398.602	14.334		MK168_8_SL8	252.111	14.575
MK168_4_SL4	399.351	10.819		MK168_8_SL8	360.862	10.961
MK168_4_SL4	367.696	11.837		MK168_8_SL8	352.726	9.656
MK168_4_SL4	320.201	12.052		MK154_2_SL28	272.221	10.69
MK168_4_SL4	366.563	10.422		MK154_2_SL28	229.654	7.416
MK168_4_SL4	342.596	9.804		MK154_2_SL28	212.466	5.846
MK154_3_19062018	351.399	8.449		MK154_2_SL28	287.737	11.63
MK154_3_19062018	405.815	7.615		MK154_2_SL28	218.69	10.519
MK154_3_19062018	338.195	8.264		MK154_2_SL28	195.126	6.534
MK154_3_19062018	305.506	8.88		MK154_2_SL28	225.403	9.812
MK154_3_19062018	351.437	11.72		MK154_2_SL28	311.578	8.205
MK154_3_19062018	368.291	12.067		MK154_2_SL28	272.165	11.324
MK154_3_19062018	318.687	10.757		MK154_2_SL28	348.841	13.876
MK154_3_19062018	366.928	9.765		MK154_2_SL28	356.684	12.322
MK154_3_19062018	360.612	8.201		MK154_2_SL29	330.448	9.828
MK154_3_19062018	363.431	11.352		MK154_2_SL29	265.272	11.081
MK154_3_19062018	329.425	11.72		MK154_2_SL29	312.809	10.467
MK154_3_19062018	387.413	12.035		MK154_2_SL29	250.905	11.085
MK154_3_19062018	352.073	8.645		MK154_2_SL29	247.018	15.505
MK154_3_19062018	381.098	10.864		MK154_2_SL29	201.187	9.837
MK154_3_19062018	375.751	11.087		MK154_2_SL29	235.159	8.48
MK154_3_19062018	390.78	15.892		MK154_2_SL29	232.189	10.287
MK154_3_19062018	367.428	11.352		MK154_2_SL29	315.866	8.05
MK154_3_19062018	385.746	9.152		MK154_2_SL29	310.989	10.016
MK154_3_19062018	366.794	11.687		MK154_2_SL29	226.745	7.359
MK154_3_19062018	357.179	7.749		MK154_2_SL29	261.574	10.016
MK154_3_19062018	390.934	7.269		MK154_2_SL29	264.612	10.956
MK154_3_19062018	388.582	9.361		MK154_2_SL29	307.008	9.422
MK154_3_19062018	405.782	8.734		MK154_2_SL29	293.743	9.309
MK154_3_19062018	440.952	10.864		MK154_2_SL29	247.515	7.359
MK154_3_19062018	453.783	11.895		MK154_2_SL29	271.359	7.917
MK154_3_19062018	415.366	12.393		MK154_2_SL29	235.066	8.396
MK154_3_19062018	423.716	10.115		MK154_2_SL29	296.03	10.33
MK154_3_19062018	337.494	9.578		MK154_2_SL29	236.829	8.311
MK154_3_19062018	327.919	10.709		MK154_2_SL29	238.666	8.959
MK154_3_19062018	362.873	10.982		MK154_2_SL29	320.394	9.469
MK154_3_19062018	330.146	9.443		MK154_2_SL29	295.863	11.125
MK154_3_19062018	335.022	9.039		MK154_2_SL29	270.928	7.747
MK154_3_19062018	330.402	9.333		MK154_2_SL29	258.739	9.077
MK154_3_19062018	374.159	9.039		MK154_2_SL29	335.569	11.061
MK154_3_19062018	349.267	11.487		MK154_2_SL29	319.659	11.029
MK154_3_19062018	334.27	9.361		MK154_2_SL29	265.539	7.502
MK154_3_19062018	408.627	10.051		MK154_2_SL29	265.455	13.09
MK154_3_19062018	378.596	10.793		MK154_2_SL29	236.797	8.687
MK154_3_19062018	379.136	11.576		MK154_2_SL29	238.277	8.532
MK154_3_19062018	425.484	12.226		MK154_2_SL29	322.46	10.635
MK154_3_19062018	389.13	11.18		MK154_2_SL29	307.247	9.077
MK154_3_19062018	421.595	12.569		MK154_2_SL29	321.601	8.3
MK154_3_19062018	386.169	8.734		MK154_2_SL29	324.205	10.016
MK154_3_19062018	422.719	10.466		MK154_2_SL29	310.474	11.196
MK154_3_19062018	417.056	12.393		MK154_2_SL29	346.368	11.307
MK154_3_19062018	365.426	13.402		MK154_2_SL29	255.255	11.463
MK154_3_19062018	375.159	15.145		MK154_2_SL29	282.282	12.22
MK154_3_19062018	370.821	11.72		MK154_2_SL29	295.582	11.685
MK154_3_19062018	365.302	12.487		MK154_2_SL29	262.67	8.687
MK154_3_19062018	369.362	12.268		MK154_2_SL29	263.999	7.632
MK154_3_19062018	358.961	10.935		MK154_2_SL29	282.306	7.201
MK154_3_19062018	319.257	8.201		MK154_2_SL29	246.81	8.889
MK154_3_19062018	348.493	8.675		MK154_2_SL29	275.365	9.627
MK154_3_19062018	305.895	6.421		MK154_2_SL29	279.478	10.424
MK154_3_19062018	364.735	10.757		MK154_2_SL29	238.574	10.568
MK154_3_19062018	330.14	10.709		MK154_2_SL29	216.149	9.422
MK154_3_19062018	461.092	10.709		MK154_2_SL29	324.961	11.125
MK154_3_19062018	421.766	8.326		MK154_2_SL29	247.472	9.627
MK154_3_19062018	378.653	11.72		MK154_2_SL29	245.198	8.687
MK154_3_19062018	409.835	10.466		MK154_2_SL30	430.5	14.324
MK154_3_19062018	392.473	10.153		MK154_2_SL30	285.202	10.66
MK154_3_19062018	404.415	8.675		MK154_2_SL30	376.535	10.253
MK154_3_19062018	405.336	12.067		MK154_2_SL30	324.771	12.971
MK154_3_19062018	356.77	11.84		MK154_2_SL30	328.212	8.794
MK154_3_19062018	365.732	9.804		MK154_2_SL30	305.038	12.102
MK154_3_19062018	391.381	14.537		MK154_2_SL30	270.959	11.067
MK154_3_19062018	374.935	10.709		MK154_2_SL30	314.954	9.077
MK154_3_19062018	352.362	9.578		MK154_2_SL30	281.675	9.146
MK154_3_19062018	346.068	7.322		MK154_2_SL30	302.938	6.206
MK154_3_19062018	318.201	7.897		MK154_2_SL30	244.232	6.789
MK154_3_19062018	309.175	15.23		MK154_2_SL30	350.141	8.883
MK154_3_19062018	312.178	12.943		MK154_2_SL30	283.633	9.828
MK154_3_19062018	416.317	14.078		MK154_2_SL30	308.229	11.376
MK154_3_19062018	392.625	13.325		MK154_2_SL30	290.732	14.992
MK154_3_19062018	325.198	11.576		MK154_2_SL30	312.563	13.496
MK154_3_19062018	359.535	15.238		MK154_2_SL30	322.389	9.551
MK154_3_19062018	355.019	8.264		MK154_2_SL30	300.687	11.038
MK154_3_19062018	325.256	10.935		MK154_2_SL30	254.613	9.3
MK154_3_19062018	364.823	12.268		MK154_2_SL30	241.477	7.805
MK154_3_19062018	333.621	12.445		MK154_2_SL30	214.081	8.594
MK154_3_19062018	349.354	11.851		MK154_2_SL30	310.406	11.732
MK154_3_19062018	384.433	10.6		MK154_2_SL30	278.125	11.376
MK154_3_19062018	326.973	10.673		MK154_2_SL30	322.635	12.437
MK154_3_19062018	377.084	10.466		MK154_2_SL30	310.942	12.475
MK154_3_19062018	356.107	18.639		MK154_2_SL30	236.24	9.699
MK154_3_19062018	332.831	10.564		MK154_2_SL30	295.765	12.837
MK154_3_19062018	331.66	9.443		MK154_2_SL30	293.171	9.418
MK154_3_19062018	299.06	11.145		MK154_2_SL30	319.027	7.559
MK154_3_19062018	318.99	9.538		MK154_2_SL30	230.314	13.531
MK154_3_19062018	362.826	9.857		MK154_2_SL30	314.851	13.601
MK154_3_19062018	338.013	10.115		MK154_2_SL30	296.141	6.406
MK154_3_19062018	369.122	10.279		MK154_2_SL30	345.012	6.765
MK154_3_19062018	343.048	15.213		MK154_2_SL30	307.117	7.538
MK154_3_19062018	390.573	13.402		MK154_2_SL30	295.932	9.828
MK154_3_19062018	380.038	11.808		MK154_2_SL30	292.874	10.129
MK154_3_19062018	369.523	11.576		MK154_2_SL30	300.613	10.129
MK154_3_19062018	326.533	11.775		MK154_2_SL30	213.1	11.195
MK154_3_19062018	300.103	12.943		MK154_2_SL30	249.007	7.642
MK154_3_19062018	409.071	10.864		MK154_2_SL30	275.363	8.989
MK154_3_19062018	377.607	12.487		MK154_2_SL30	245.422	7.985
MK154_3_19062018	407.979	11.808		MK154_2_SL30	232.412	11.569
MK154_3_19062018	403.141	12.268		MK154_2_SL30	324.936	10.129
MK154_3_19062018	368.751	10.9		MK154_2_SL30	300.509	9.146
MK154_3_19062018	381.076	10.216		MK154_2_SL30	325.93	9.812
MK154_3_19062018	420.876	10.279		MK154_2_SL30	304.553	9.077
MK154_3_19062018	357.793	8.734		MK154_2_SL30	302.702	9.059
MK154_3_19062018	367.43	10.9		MK154_2_SL30	244.048	12.063
MK154_3_19062018	448.441	10.416		MK154_2_SL30	309.358	10.05
MK154_3_19062018	423.936	10.466		MK154_2_SL30	313.55	9.828
MK154_3_19062018	376.17	14.801		MK154_2_SL30	278.22	8.794
MK154_3_19062018	334.195	7.881		MK154_2_SL30	211.09	9.3
MK154_3_19062018	355.27	12.487		MK154_2_SL30	281.255	13.032
MK154_3_19062018	360.372	10.673		MK154_2_SL30	448.959	10.175
MK154_3_19062018	333.574	10.982		MK154_2_SL30	289.295	10.69
MK154_3_19062018	354.256	9.765		MK154_2_SL30	368.997	11.583
MK154_3_19062018	351.928	8.186		MK154_2_SL30	243.401	10.851
MK154_3_19062018	344.064	8.981		MK154_2_SL30	321.987	11.152
MK154_3_19062018	365.808	8.449		MK154_2_SL30	288.173	10.05
MK154_3_19062018	389.084	10		MK154_2_SL30	291.3	15.428
MK154_3_19062018	381.452	10.077		MK154_2_SL30	250.737	11.152
MK154_3_19062018	337.429	11.981
MK154_3_19062018	404.64	14.041
MK154_3_19062018	393.892	10.416
MK154_3_19062018	335.022	8.326
MK154_3_19062018	319.481	11.509
MK154_3_19062018	346.52	10.769
MK154_3_19062018	329.976	12.487
MK154_3_19062018	354.447	12.393
MK154_3_19062018	348.44	13.012
MK154_3_19062018	334.199	17.065
MK154_3_19062018	327.447	9.443
MK154_3_19062018	257.833	9.765
MK154_3_19062018	365.41	12.035
MK154_3_19062018	336.815	11.84
MK154_3_19062018	319.23	11.408
MK154_3_19062018	399.133	10.673
MK154_3_19062018	358.772	14.448
MK154_3_19062018	334.125	10.959
MK154_3_19062018	401.556	10.769
MK154_3_19062018	377.363	9.138
MK154_3_19062018	392.423	15.238
MK154_3_19062018	423.014	15.306
MK154_3_19062018	384.311	11.352
MK154_3_19062018	383.681	11.599
MK154_3_19062018	319.474	13.002
MK168_6_SL2	337.797	9.319
MK168_6_SL2	329.907	8.88
MK168_6_SL2	312.062	5.763
MK168_6_SL2	290.514	8.193
MK168_6_SL2	310.397	7.718
MK168_6_SL2	322.415	9.031
MK168_6_SL2	265.35	7.306
MK168_6_SL2	277.122	8.241
MK168_6_SL2	290.826	6.176
MK168_6_SL2	409.56	9.41
MK168_6_SL2	284.392	7.422
MK168_6_SL2	357.427	7.872
MK168_6_SL2	283.288	9.113
MK168_6_SL2	244.698	7.515
MK168_6_SL2	300.204	8.186
MK168_6_SL2	291.252	7.987
MK168_6_SL2	329.039	9.238
MK168_6_SL2	320.092	6.811
MK168_6_SL2	325.12	9.578
MK168_6_SL2	309.681	6.51
MK168_6_SL2	340.989	6.769
MK168_6_SL2	333.797	5.155
MK168_6_SL2	290.588	7.171
MK168_6_SL2	345.37	11.019
MK168_6_SL2	333.98	7.195
MK168_6_SL2	307.706	7.243
MK168_6_SL2	329.038	7.243
MK168_6_SL2	280.2	6.501
MK168_6_SL2	300.499	9.68
MK168_6_SL2	307.246	9.081
MK168_6_SL2	285.039	7.492
MK168_6_SL2	319.965	7.605
MK168_6_SL2	239.651	9.762
MK168_6_SL2	255.591	7.179
MK168_6_SL2	300.82	7.732
MK168_6_SL2	296.239	7.605
MK168_6_SL2	288.698	7.139
MK168_6_SL2	309.592	10.279
MK168_6_SL2	328.755	15.094
MK168_6_SL2	339.867	7.547
MK168_6_SL2	295.384	9.152
MK168_6_SL2	358.456	10.982
MK168_6_SL2	299.722	6.773
MK168_6_SL2	302.948	8.186
MK168_6_SL2	302.914	7.547
MK168_6_SL2	315.669	7.269
MK168_6_SL2	324.967	9.538
MK168_6_SL2	309.09	9.857
MK168_6_SL2	337.933	8.326
MK168_6_SL2	377.909	9.538
MK168_6_SL2	313.426	10.416
MK168_6_SL2	284.149	8.866
MK168_6_SL2	310.127	9.152
MK168_6_SL2	296.541	9.081
MK168_6_SL2	328.767	11.237
MK168_6_SL2	273.055	11.352
MK168_6_SL2	338.94	10.769
MK168_6_SL2	315.468	9.857
MK168_6_SL2	287.82	14.105
MK168_6_SL2	301.061	8.027
MK168_6_SL2	302.587	7.495
MK168_6_SL2	323.285	9.039
MK168_6_SL2	296.677	10.077
MK168_6_SL2	331.707	12.691
MK168_6_SL3	274.115	6.977
MK168_6_SL3	292.898	6.977
MK168_6_SL3	323.427	8.668
MK168_6_SL3	313.517	8.461
MK168_6_SL3	313.995	7.179
MK168_6_SL3	331.201	7.791
MK168_6_SL3	324.761	7.901
MK168_6_SL3	260.998	8.151
MK168_6_SL3	306.053	9.578
MK168_6_SL3	324.285	7.93
MK168_6_SL3	323.637	7.718
MK168_6_SL3	345.089	7.718
MK168_6_SL3	313.656	6.51
MK168_6_SL3	322.102	9.293
MK168_6_SL3	334.695	9.163
MK168_6_SL3	289.607	6.323
MK168_6_SL3	320.46	8.379
MK168_6_SL3	284.41	7.115
MK168_6_SL3	256.267	7.791
MK168_6_SL3	257.793	8.461
MK168_6_SL3	269.724	6.101
MK168_6_SL3	316.879	9.293
MK168_6_SL3	296.119	8.488
MK168_6_SL3	275.395	7.732
MK168_6_SL3	300.685	7.422
MK168_6_SL3	325.785	9.144
MK168_6_SL3	290.662	7.43
MK168_6_SL3	283.301	8.668
MK168_6_SL3	338.806	7.605
MK168_6_SL3	305.876	6.026
MK168_6_SL3	324.726	9.41
MK168_6_SL3	290.076	8.825
MK168_6_SL3	336.985	8.262
MK168_6_SL3	295.861	7.894
