# Supplementary material for: Coordinated hedgehog signaling induces new hair follicles in adult skin
Source: eLife. 2020 Mar 17;9:e46756. doi: 10.7554/eLife.46756 (PMC7077985; doi:10.7554/eLife.46756)
Supplement: Figure 8—source data 1. — Data are grouped according to mouse genotype. [file elife-46756-fig8-data1.xlsx]

## Sheet: All data
		Mouse ID	ZZ HFs	Isthmus dnHF	ID	Image name		Summary
Gli1	Ptch1(fl/wt)	MK154:3	10	0	MK154:3	MK154_3_19062018_Gli1_PtchcondHet_T9w_ToPro3_Panorama_Zstack1_20x.nd2		Genotype	Ptch1	ZZ HFs without isthmus dnHF	ZZ HFs with isthmus dnHF
			13	0	MK154:3	MK154_3_19062018_Gli1_PtchcondHet_T9w_ToPro3_Panorama_Zstack2_20x.nd2
			17	0	MK154:3	MK154_3_19062018_Gli1_PtchcondHet_T9w_ToPro3_Panorama_Zstack3_20x.nd2		Gli1	fl/wt	335	0
			26	0	MK154:3	MK154_3_19062018_Gli1_PtchcondHet_T9w_ToPro3_Panorama_Zstack4_20x.nd2			fl/fl	668	16
			31	0	MK154:3	MK154_3_19062018_Gli1_PtchcondHet_T9w_ToPro3_Panorama_Zstack5_20x.nd2		Lgr6	fl/fl	207	0
		MK168:4	40	0	MK168:4	SL3_20170606_MK168_4_T9w_ctrl_TD_Panorama_Zstack4.nd2			fl/wt	83	0
			34	0	MK168:4	SL4_20170606_MK168_4_T9w_ctrl_TD_Panorama_Zstack1.nd2
			17	0	MK168:4	SL4_20170606_MK168_4_T9w_ctrl_TD_Panorama_Zstack2.nd2		Percentages
			33	0	MK168:4	SL4_20170606_MK168_4_T9w_ctrl_TD_Panorama_Zstack3.nd2		Genotype	Ptch1	ZZ HFs without isthmus dnHF	ZZ HFs with isthmus dnHF
		MK168:6	18	0	MK168:6	SL2_20170627_MK168_6_T9w_BF_K8_Tom_Panorama_Zstack2.nd2
			27	0	MK168:6	SL2_20170627_MK168_6_T9w_BF_K8_Tom_Panorama_Zstack3.nd2		Gli1	fl/wt	1	0
			35	0	MK168:6	SL2_20170627_MK168_6_T9w_Panorama_Zstack1.nd2			fl/fl	0.976608	0.0233918
			34	0	MK168:6	SL3_20170629_MK168_6_T9w_BF_K8_Tom_Panorama_Zstack1.nd2		Lgr6	fl/fl	1	0
	Ptch1(fl/fl)	MK154:2	25	1	MK154:2	SL28_MK154_2_T9w_20190812_BF_K8_Tom_Panorama_Zstack3_20x.nd2			fl/wt	1	0
			39	1	MK154:2	SL28_MK154_2_T9w_20190812_BF_K8_Tom_Panorama_Zstack4_20x.nd2
			32	0	MK154:2	SL29_MK154_2_T9w_20190812_BF_K8_Tom_Panorama_Zstack2_20x.nd2
			38	3	MK154:2	SL29_MK154_2_T9w_20190812_BF_K8_Tom_Panorama_Zstack3_20x.nd2
			56	0	MK154:2	SL30_MK154_2_T9w_20190812_BF_K8_Tom_Panorama_Zstack4_20x.nd2
			46	1	MK154:2	SL30_MK154_2_T9w_20190812_BF_K8_Tom_Panorama_Zstack5_20x.nd2
		MK168:1	40	0	MK168:1	SL5_20170606_MK168_1_T9w_TD_Panorama_Zstack1.nd2
			37	0	MK168:1	SL5_20170606_MK168_1_T9w_TD_Panorama_Zstack2_10x_Overview
			30	1	MK168:1	SL6_20170606_MK168_1_T9w_TD_Panorama_Zstack1.nd2
			43	0	MK168:1	SL22_20170711_MK168_1_T9w_s3.1_AP_K8_BF_Panorama_zstack_4TDs.nd2
			19	0	MK168:1	SL23_20170711_MK168_1_T9w_s2.1_BF_Panorama_zstack_1TD.nd2
			13	0	MK168:1	SL23_20170711_MK168_1_T9w_s2.1_BF_Panorama1_zstack.nd2
			41	1	MK168:1	SL23_20170711_MK168_1_T9w_s2.2_BF_Panorama_zstack_3TDs.nd2
			7	0	MK168:1	SL23_20170711_MK168_1_T9w_s2.2_BF_Panorama1_zstack_1TD.nd2
			12	0	MK168:1	SL24_20170711_MK168_1_T9w_s1.1_AP_K8_BF_Panorama_zstack_2TDs.nd2
		MK168:8	21	0	MK168:8	SL1_20170606_MK168_8_T9w_TD_Panorama_Zstack1.nd2
			15	1	MK168:8	SL2_20170606_MK168_8_T9w_TD_Panorama_Zstack2.nd2
			16	1	MK168:8	SL2_20170606_MK168_8_T9w_TD_Panorama_Zstack3.nd2
			18	1	MK168:8	SL2_20170606_MK168_8_T9w_TD_Panorama_Zstack4.nd2
			21	0	MK168:8	SL7_20170605_MK168_8_T9w_TD_Panorama_Zstack1.nd2
			30	1	MK168:8	SL7_20170605_MK168_8_T9w_TD_Panorama_Zstack3.nd2
			33	0	MK168:8	SL8_20170606_MK168_8_T9w_TD_Panorama_Zstack1.nd2
			36	4	MK168:8	SL8_20170606_MK168_8_T9w_TD_Panorama_Zstack2.nd2
Lgr6	Ptch1(fl/fl)	MK155:4	15	0	MK155:4	MK155_4_SL54_T9w-Lgr6_20170722_BF_K8_Tom_Panorama_Zstack4_10x
			12	0	MK155:4	MK155_4_SL54_T9w-Lgr6_20170722_BF_K8_Tom_Panorama_Zstack3_10x
			26	0	MK155:4	MK155_4_SL54_T9w-Lgr6_20170722_BF_K8_Tom_Panorama_Zstack2_10x
			63	0	MK155:4	MK155_4_SL54_T9w-Lgr6_20170722_BF_K8_Tom_Panorama_Zstack1_10x
			12	0	MK155:4	MK155_4_Lgr6_Tom_Ptchhomo_Troma_Toto1_20140307_Panorama1_Zstack
		MK155:1	13	0	MK155:1	MK155_1_Lgr6_Tom_Ptchhomo_Troma_Toto1_20140307_Panorama1_Zstack
		MK129:2	19	0	MK129:2	MK129_2_Lgr6_Tomato_PtchCondhomo_20140311_Panorma1_Zstack
			10	0	MK129:2	MK129_2_Lgr6_Tomato_PtchCondhomo_20140311_Panorma2_Zstack
			13	0	MK129:2	MK129_2_Lgr6_Tomato_PtchCondhomo_20140311_Panorma3_Zstack
			16	0	MK129:2	MK129_2_Lgr6_Tomato_PtchCondhomo_20140311_Panorma8_Zstack
			8	0	MK129:2	MK129_2_Lgr6_Tomato_PtchCondhomo_20140311_Panorma11_Zstack
	Ptch1(fl/wt)	MK247:3	6	0	MK247:3	MK247_3_30062018_Lgr6cre_PtchcondHet_T9w_DAPI_GFP_Tomato_Troma_TD2_Zstack_Panorama
			7	0	MK247:3	MK247_3_30062018_Lgr6cre_PtchcondHet_T9w_DAPI_GFP_Tomato_Troma_TD6_Zstack_Panorama
		MK247:4	24	0	MK247:4	MK247_4_30062018_Lgr6cre_PtchcondHet_T9w_DAPI_GFP_Tomato_Troma_TD1_Zstack_Panorama
			27	0	MK247:4	MK247_4_30062018_Lgr6cre_PtchcondHet_T9w_DAPI_GFP_Tomato_Troma_TD2_Zstack_Panorama
			13	0	MK247:4	MK247_4_30062018_Lgr6cre_PtchcondHet_T9w_DAPI_GFP_Tomato_Troma_TD3_Zstack_Panorama
		MK156:1	6	0	MK156:1	MK156_1_Lgr6_Tom_PtchCondhet_Troma_Toto1_20140307_Panorama1_Zstack
