# Supplementary material for: Coordinated hedgehog signaling induces new hair follicles in adult skin
Source: eLife journal article supplement (doi:10.7554/elife.46756), 2020-03-16
Supplement: figures [file elife-46756-figures-v1.pdf]

---

## Figures and figure supplements

Coordinated hedgehog signaling induces new hair follicles in adult skin

**Xiaoyan Sun et al**

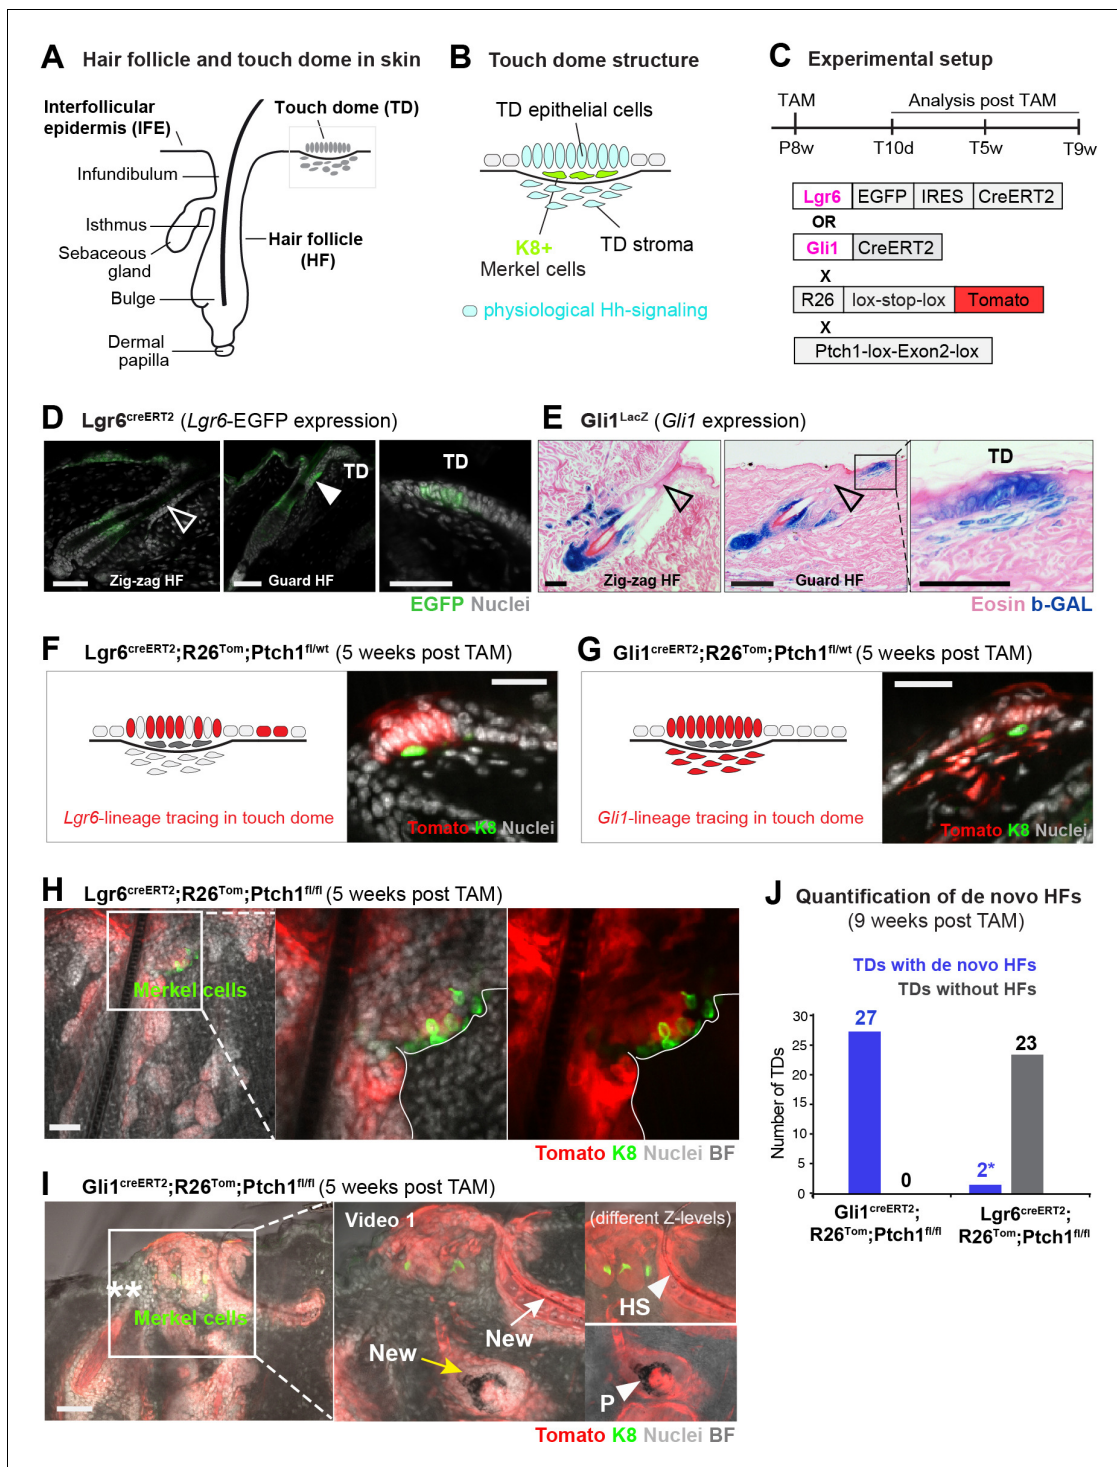

**Figure 1.** Formation of hair follicle (HF)-like structures in touch domes (TDs) of the  $Gli1$  mouse model. (A–B) Illustrative cartoon of HF and TD structures in wild type skin. Physiological Hh signaling is present in both TD epithelium and TD stroma. The presence of K8+ Merkel cells is characteristic for TDs. (C) Schematic representation of the experimental timeline and the  $Lgr6^{creERT2};R26^{Tom};Ptch1^{fl/fl}$  and  $Gli1^{creERT2};R26^{Tom};Ptch1^{fl/fl}$  mouse models. (D–E)  $Lgr6^{EGFP}$  and  $Gli1^{LacZ}$  expression in dorsal telogen skin. Filled arrowhead: indicates  $Lgr6$ -expression in the HF infundibulum. Empty arrowheads: indicate lack of  $Lgr6$ - or  $Gli1$ -expression in HF infundibula ( $n = 3$  mice per genotype). (F–I) Mice were treated with tamoxifen (TAM) at 8 weeks of age and dorsal skin was analyzed 5 weeks post TAM. For each genotype  $\geq 3$  mice and numerous TDs were analyzed (**Supplementary file 1**). (F) Illustrative cartoon and experimental Tomato-tracing of  $Lgr6$ -expressing cells. TDs of  $Lgr6^{creERT2};R26^{Tom};Ptch1^{fl/fl}$  control skin were phenotypically normal. (G) Illustrative cartoon and experimental Tomato-tracing of  $Gli1$ -expressing cells. TDs of  $Gli1^{creERT2};R26^{Tom};Ptch1^{fl/fl}$  control skin were phenotypically normal. (H) Figure 1 continued on next page

# Figure 1 continued

Tomato-traced TD of  $Lgr6^{creERT2};R26^{Tom};Ptch1^{fl/fl}$  skin displaying basal cell carcinoma (BCC)-like tumor growth. (I) Tomato-traced TD of  $Gli1^{creERT2};R26^{Tom};Ptch1^{fl/fl}$  skin with BCC-like tumor growth and several de novo HFs. Asterisks: mark a non-traced infundibulum in the pre-existing Guard HF adjacent to the TD. Inset: different z-levels better depicting specific de novo HF structures. A video containing all z-levels is provided (**Figure 1—video 1**). Arrows: de novo HFs with continuous tracing into the IFE. Yellow arrow: anagen bulb of a de novo HF. Arrowheads: hair shaft (HS) or pigment (P). (J) Quantification of de novo HFs in the TDs of  $Gli1^{creERT2};R26^{Tom};Ptch1^{fl/fl}$  and  $Lgr6^{creERT2};R26^{Tom};Ptch1^{fl/fl}$  mice (9 weeks post TAM; n = 3 mice for each genotype). Asterisk: the  $Lgr6$  mouse model cannot inform on de novo HFs through lineage tracing; based on morphology we observed in two TDs a single potentially new hair shaft, respectively. TD: touch dome. HS: hair shaft. P: pigment. TAM: tamoxifen. BF: bright field. Scale bars: 50  $\mu$ m (**D–I**).

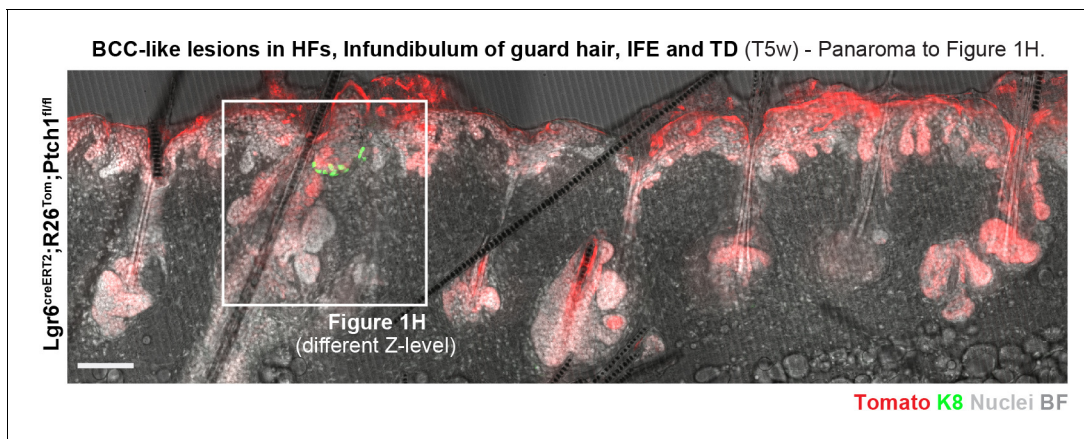

**Figure 1—figure supplement 1.** Panorama to **Figure 1H**.  $Lgr6^{creERT2};R26^{Tom};Ptch1^{fl/fl}$  mice were treated with TAM at 8 weeks of age, and dorsal skin was analyzed 5 weeks post TAM ( $n = 3$  mice). BCC-like lesions were observed in the HF isthmus, the infundibulum of guard HFs, the IFE, and in TDs. This panorama shows a different z-level than **Figure 1H** to better depict HF- and IFE-associated BCC-like lesions. Scale bar: 100  $\mu m$ .



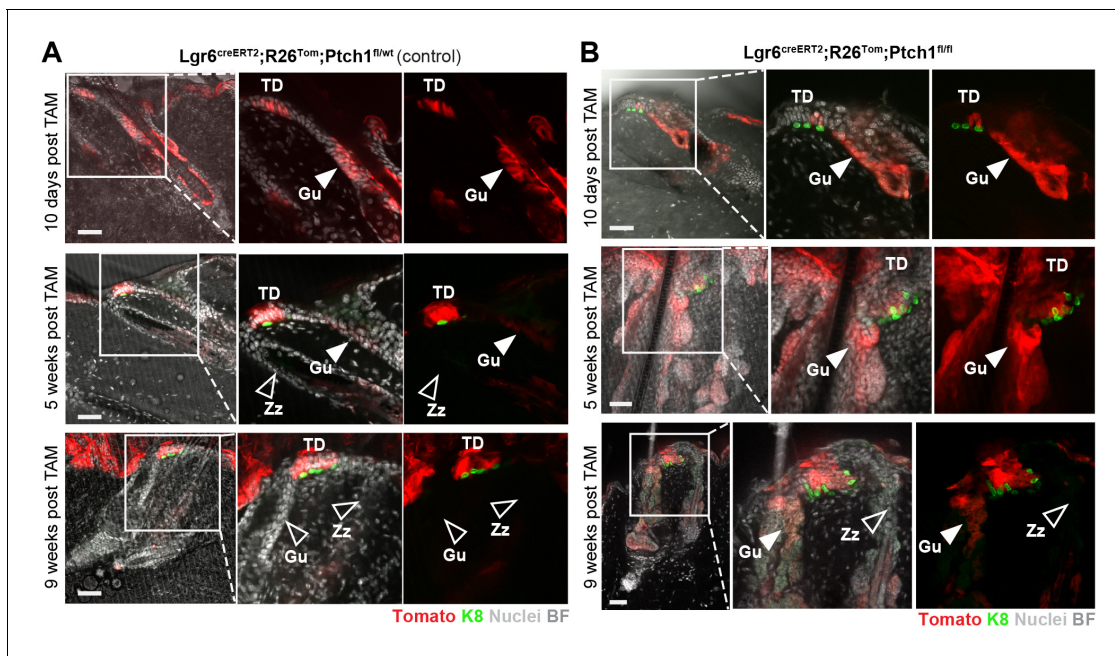

**Figure 1—figure supplement 2.** Phenotype and lineage-tracing pattern in  $Lgr6^{creERT2};R26^{Tom};Ptch1^{fl/wt}$  and  $Lgr6^{creERT2};R26^{Tom};Ptch1^{fl/fl}$  skin. (A–B) Mice were treated with TAM at 8 weeks of age and dorsal skin was analyzed post TAM as indicated in the figure panels ( $n = 3$  mice for each genotype and time point). (A)  $Lgr6^{creERT2};R26^{Tom};Ptch1^{fl/wt}$  control mice. At all time points, the skin phenotype was normal. IFE and HF were Tomato-traced as reported (Füllgrabe et al., 2015). The infundibula of Guard HF were often partially traced (filled arrowheads) and the infundibula of TD-adjacent pre-existing Zig-zag HF were not traced (empty arrowheads). (B)  $Lgr6^{creERT2};R26^{Tom};Ptch1^{fl/fl}$  mice. At 5 and 9 weeks post TAM, BCC-like lesions are present in HF, IFE and TDs; traced and non-traced lesions are present as the  $Ptch1^{fl/fl}$  alleles are 'flox' with higher efficiency than LSL-Tomato alleles (data not shown). The infundibula of Guard HF were partially traced (filled arrowheads) and the infundibula of TD-adjacent pre-existing Zig-zag HF retained non-traced (empty arrowheads) even when BCC-like lesions formed. Please note that some images are used in the main figures, however with different emphasis and display <sup>(a)</sup> extended area view of **Figure 1F**; <sup>(b)</sup> same image as in **Figure 1H**. TD: touch dome. Gu: Guard HF. Zz: Zig-zag HF. BF: bright field. Scale bars: 50  $\mu m$ .

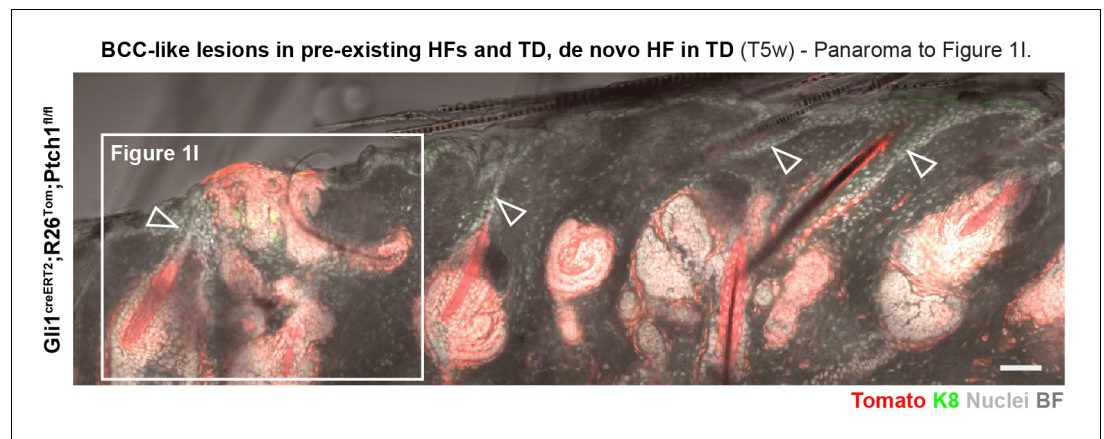

**Figure 1—figure supplement 3.** Panorama to **Figure 1l**. Gli1<sup>creERT2</sup>;R26<sup>Tom</sup>;Ptch1<sup>fl/fl</sup> mice were treated with TAM at 8 weeks of age, and dorsal skin was analyzed 5 weeks post TAM (n = 3 mice). BCC-like lesions were observed in pre-existing HF and TDs. Additionally, new HF-like structures were found in the TDs of Gli1<sup>creERT2</sup>;R26<sup>Tom</sup>;Ptch1<sup>fl/fl</sup> skin. Note the untraced infundibulum of pre-existing HF (arrowheads). Scale bar: 50  $\mu$ m.

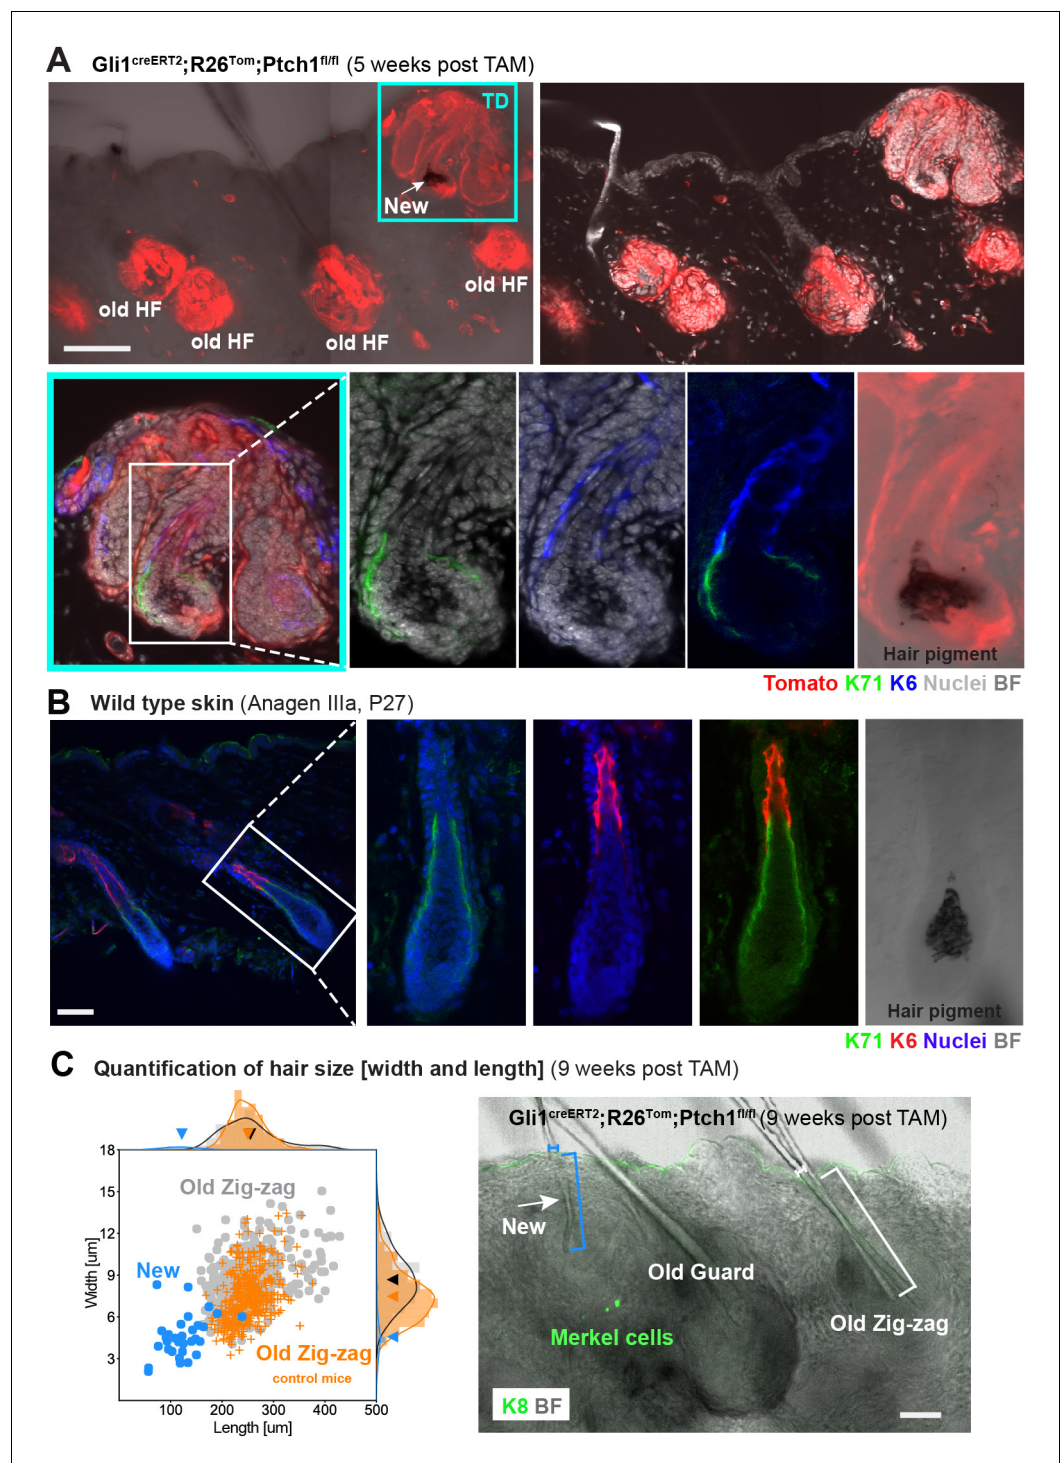

**Figure 2.** Characterization of de novo hair follicles (HF) in  $Gli1^{creERT2};R26^{Tom};Ptch1^{fl/fl}$  touch domes (TDs). (A)  $Gli1^{creERT2};R26^{Tom};Ptch1^{fl/fl}$  mice were treated with tamoxifen (TAM) at 8 weeks and dorsal skin was analyzed 5 weeks post TAM treatment ( $n = 3$  mice). The TD area shows a de novo anagen HF (turquoise frame). Additionally, traced pre-existing (old) telogen HF with basal cell carcinoma (BCC)-like growth are present. Inset (white frame): anagen hair bulb of de novo HF showing K71-positive Henle's layer, K6-positive companion layer, hair pigment and continuous Tomato-tracing from the hair bulb into the TD. (B) Immunofluorescent co-staining of K71 (Henle's layer) and K6 (companion layer) in a wild type HF of a similar hair cycle stage (Anagen IIIa, P27) ( $n = 2$  mice). (C) Quantification of hair size in  $Gli1^{creERT2};R26^{Tom};Ptch1^{fl/fl}$  and  $Gli1^{creERT2};R26^{Tom};Ptch1^{fl/wt}$  mice that were treated with TAM at 8 weeks and dorsal skin was analyzed 9 weeks post TAM treatment. Right panel: De novo telogen

Figure 2 continued on next page

*Figure 2 continued*

HFs with a thin hair shaft formed in the TDs of Gli1<sup>creERT2</sup>;R26<sup>Tom</sup>;Ptch1<sup>fl/fl</sup> skin (white arrow). For the quantification, we analyzed hair shafts of de novo HFs from Gli1<sup>creERT2</sup>;R26<sup>Tom</sup>;Ptch1<sup>fl/fl</sup> mice (blue bracket), old/pre-existing Zig-zag HFs from the same mice (white bracket), and Zig-zag HFs from wild-type-phenotype control mice (Gli1<sup>creERT2</sup>;R26<sup>Tom</sup>;Ptch1<sup>fl/wt</sup>) (n = 3 mice for each genotype; 34 de novo, 314 old/pre-existing, and 437 control HFs;

**Figure 2—source data 1**). Hair shaft length was measured in telogen stage hair shafts from the hair club to the HF opening (as indicated by the blue and white brackets). Left panel: Each dot represents a hair shaft and the dots are colored according to the HF type (blue for de novo HFs, gray for pre-existing Zig-zag HFs, orange for control Zig-zag HFs). De novo hair shafts were significantly smaller (p-value < 1.10<sup>-6</sup>) and thinner (p-value < 1.10<sup>-6</sup>) compared to old/pre-existing and control Zig-zag hairs (Mann-Whitney U test). Arrowheads on the x- and y-axis indicate the mean values of hair shaft length and width of de novo, old/pre-existing or control Zig-zag HFs, respectively. TD: touch dome. HF: hair follicle. TAM: tamoxifen. BF: bright field. Scale bars: 100 μm (A), 50 μm (B, C).



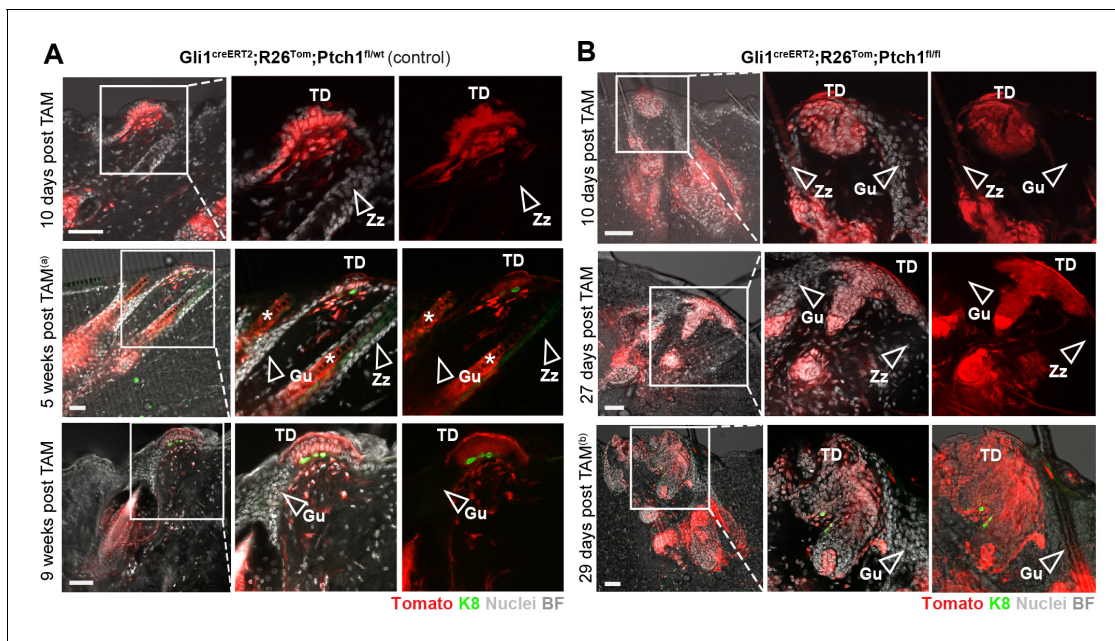

**Figure 2—figure supplement 1.** Lineage-tracing pattern of TD and surrounding area in Gli1<sup>creERT2</sup>;R26<sup>Tom</sup>;Ptch1<sup>fl/wt</sup> control and Gli1<sup>creERT2</sup>;R26<sup>Tom</sup>;Ptch1<sup>fl/fl</sup> skin during de novo HF formation. (A–B) Mice were treated with TAM at 8 weeks of age and dorsal skin was analyzed post TAM as indicated in the figure panels (n = 3 mice for each genotype and time point; except n = 1 for 29 days post TAM). The infundibula of pre-existing TD-adjacent HFs (Guard HFs as well as Zig-zag HFs) in both Gli1<sup>creERT2</sup>;R26<sup>Tom</sup>;Ptch1<sup>fl/wt</sup> control mice (A) and Gli1<sup>creERT2</sup>;R26<sup>Tom</sup>;Ptch1<sup>fl/fl</sup> mice (B) were never traced (empty arrowheads), even when BCC-like lesions and/or de novo HFs formed. In contrast, de novo HFs always showed continuous HF-to-TD tracing. Please note that some images are used in the main figures with different emphasis and display <sup>(a)</sup> extended area view of **Figure 1G**; <sup>(b)</sup> same image as in **Figure 3D**). Asterisks: mark hair shafts that are naturally traced during anagen in these mice. TD: touch dome. Gu: Guard HF. Zz: Zig-zag HF. BF: bright field. Scale bars: 50 μm.

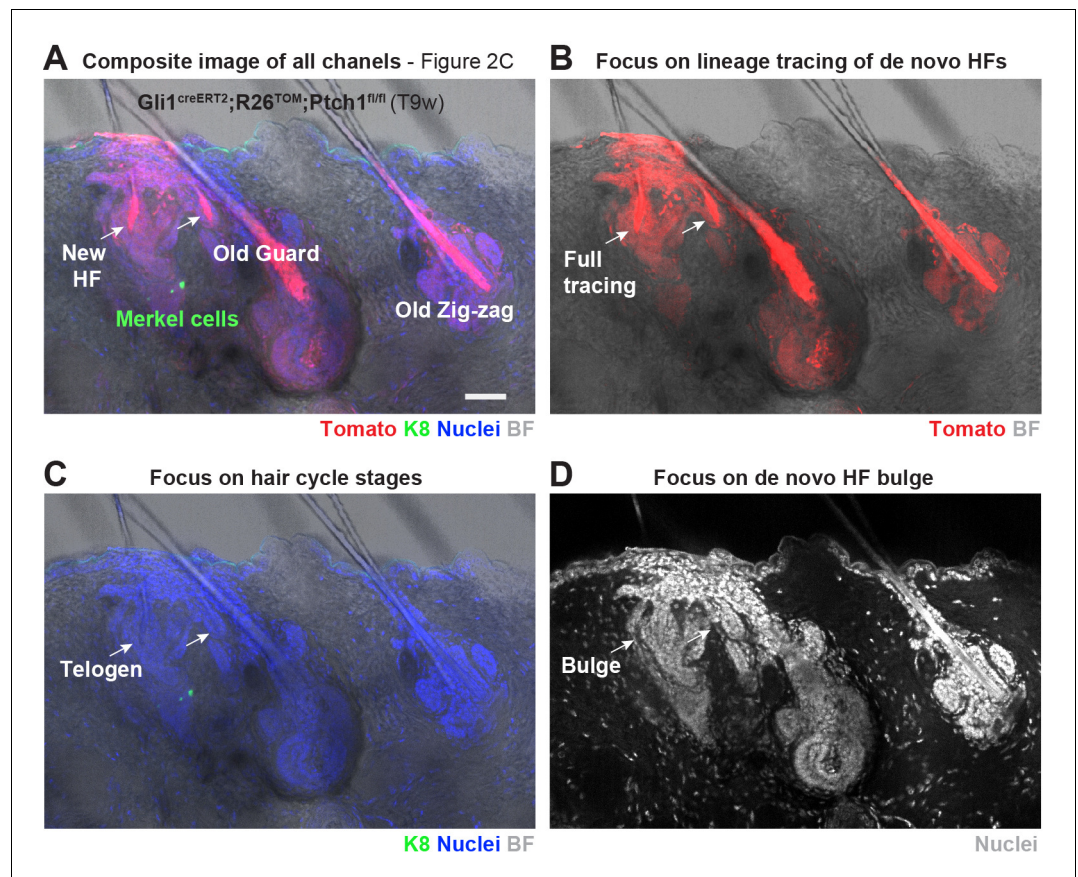

**Figure 2—figure supplement 2.** De novo HF in TDs of Gli1<sup>creERT2</sup>;R26<sup>Tom</sup>;Ptch1<sup>fl/fl</sup> mice 9 weeks post TAM were in telogen and displayed a HF bulge. (A–D) Gli1<sup>creERT2</sup>;R26<sup>Tom</sup>;Ptch1<sup>fl/fl</sup> mice were treated with TAM at 8 weeks and dorsal skin was analyzed 9 weeks post TAM treatment (n = 3 mice). Note that the BF and K8 channel of this picture are shown in **Figure 2C**. The de novo HF originated from the TD next to the guard hair (A). They are fully traced while there is a clearly non-traced gap in the infundibulum of guard HF and pre-existing Zig-zag HF (B). Both de novo HF were in telogen stage (C) with a noticeable telogen bulge (D). TAM: tamoxifen. BF: bright field. Scale bars: 50 μm.



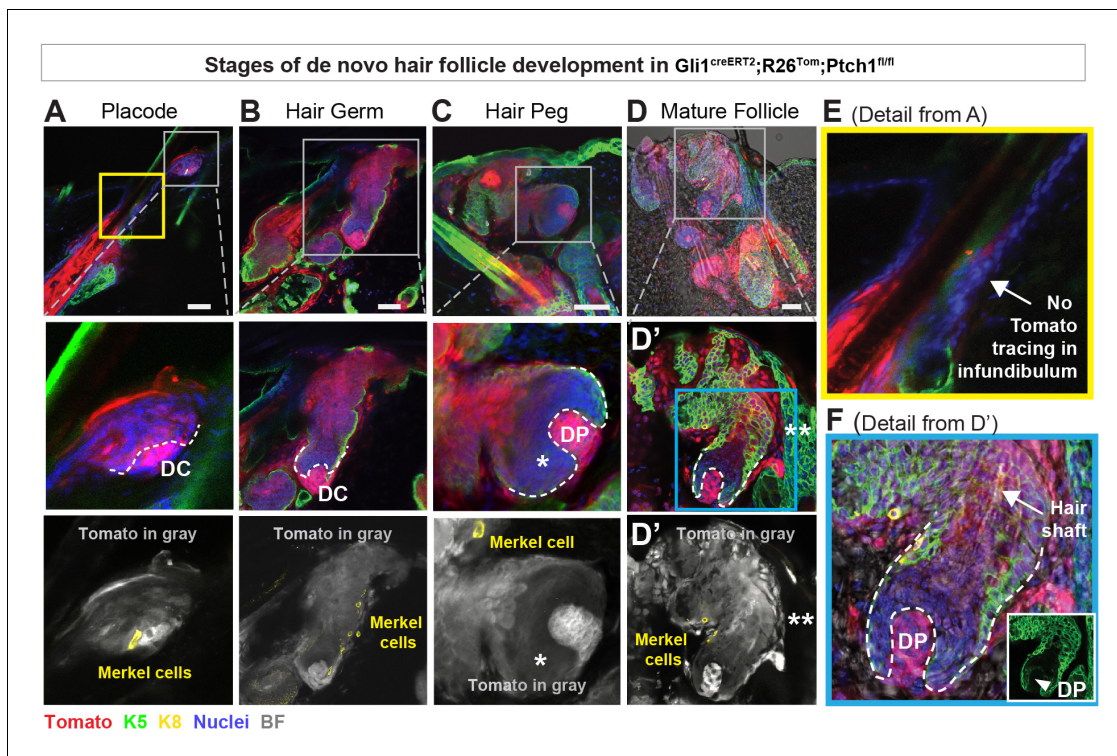

**Figure 3.** Developmental stages of de novo hair follicles (HF) in *Glil<sup>creERT2</sup>;R26<sup>Tom</sup>;Ptc1<sup>fl/fl</sup>* touch domes (TDs). (A–F) *Glil<sup>creERT2</sup>;R26<sup>Tom</sup>;Ptc1<sup>fl/fl</sup>* mice were treated with tamoxifen (TAM) at 8 weeks and dorsal skin was analyzed 10–36 days post TAM to characterize de novo HF originating from TDs in the following developmental stages (n = 6 mice): early placode (A), hair germ (B), hair peg (C), and mature follicle (D). These stages recapitulate embryonic HF development (Rendl et al., 2005). Dermal condensates (A, B) or dermal papillae (C, D) are clearly visible, and the de novo HF – both early and mature – are continuously traced into the TD. Note: HF-matrix cells are Tomato-traced with reduced intensity (\* in C), while the infundibulum of pre-existing HF was not Tomato- traced (\*\* in D' and arrow in E). Furthermore, mature HF contain a hair shaft (arrow in F). Inset in F shows K5-positive staining of the HF epithelial cells and a K5-negative dermal papilla. DC: dermal condensate. DP: dermal papilla. BF: bright field. Scale bars: 50  $\mu$ m (A–D).

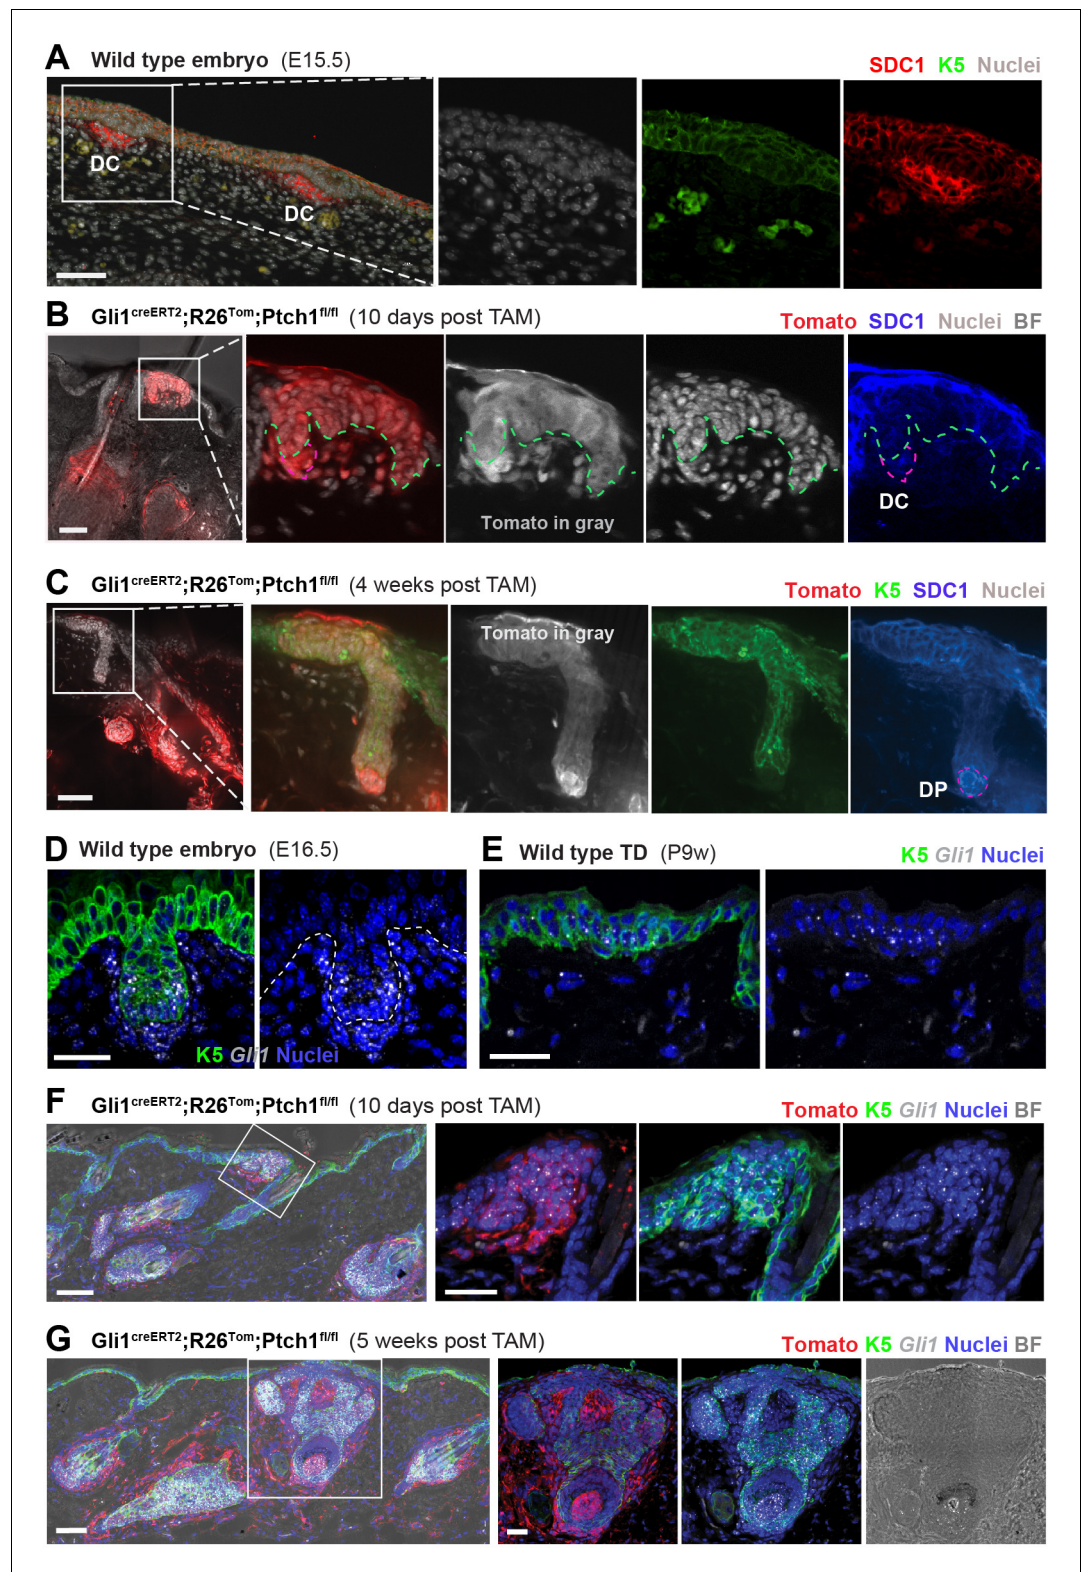

**Figure 4.** SDC1 protein and *Gli1* mRNA expression in developing hair follicles (HFs). (A) In wild type embryonic skin (E15.5), Syndecan-1 (SDC1) staining highlights dermal condensates (DCs) ( $n = 2$  mice). (B–C) Gli1<sup>creERT2</sup>; R26<sup>Tom</sup>;Ptch1<sup>fl/fl</sup> mice were treated with tamoxifen (TAM) at 8 weeks and dorsal skin was analyzed for SDC1 expression in the newly formed HF buds ( $n = 3$  mice). (B) Early placode stage (image from a TD 10 days post TAM) displaying faint SDC1 staining in dermal condensate cells. Comparable to epithelium of wild type embryonic HF

Figure 4 continued on next page

Figure 4 continued

buds, early de novo placodes also express some SDC1. (C) Positive SDC1 staining of dermal papilla (image from a TD 4 weeks post TAM). (D–E) *Gli1* RNA-FISH. Both the epithelial placode and dermal condensate have active Hh/Gli signaling in wild type embryonic skin (E16.5) (D) and at lower levels in wild type TDs of adult skin (E). (F–G) *Gli1*<sup>creERT2</sup>;R26<sup>Tom</sup>;Ptc1<sup>fl/fl</sup> mice were treated with TAM at 8 weeks and dorsal skin was analyzed for *Gli1* mRNA expression in the placode stage (10 days post TAM) as well as in an intermediate developmental stage (5 weeks post TAM). Active canonical Hh/Gli signaling was present in all analyzed de novo HF stages in epithelial and dermal papilla cells. Note that Tomato-tracing was visualized using an RFP-antibody. Green and white dashed lines: epithelial-stromal border. Purple dashed line: outlines the dermal condensate. DC: dermal condensate. DP: dermal papilla. TD: touch dome. BF: bright field. For RNA-FISH stainings, n = 2 mice (D, E and G) and n = 1 mouse (F). Scale bars: 25 μm (D–G), 50 μm (A–C, F–G panoramas).



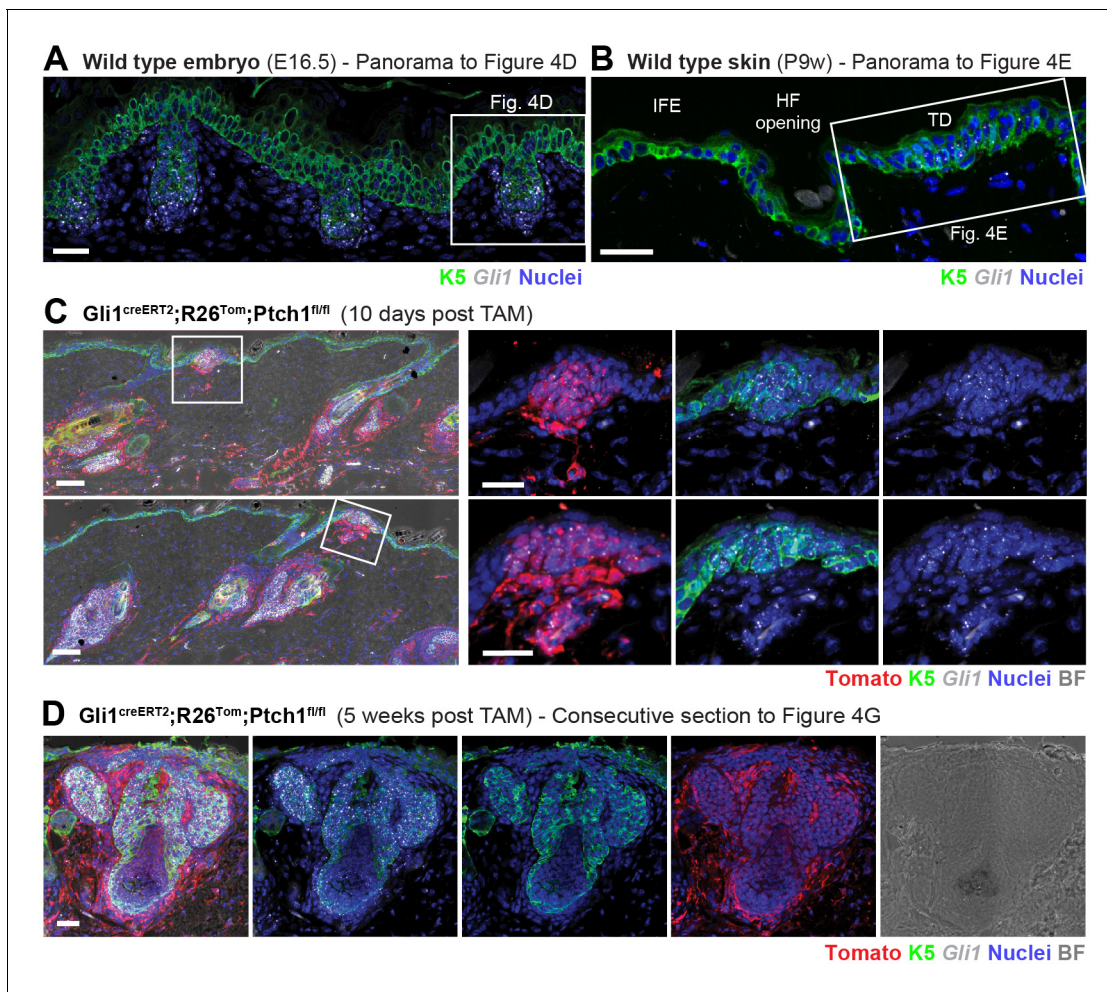

**Figure 4—figure supplement 1.** *Gli1* mRNA staining reveals cells with active canonical Hh/Gli signaling during de novo HF development in the TDs of Gli1<sup>creERT2</sup>;R26<sup>Tom</sup>;Ptch1<sup>fl/fl</sup> mice. (A) Panorama to **Figure 4D**. In wild type embryonic skin (E16.5), the epithelial placodes as well as dermal condensates show clear *Gli1* mRNA expression, while the IFE is mostly devoid of *Gli1* mRNA. (B) Panorama to **Figure 4E**. In wild type skin from postnatal 9-week-old mice, *Gli1* mRNA is present in the epithelial and stromal components of the TD (white frame) but absent in the rest of the IFE. (C) Gli1<sup>creERT2</sup>;R26<sup>Tom</sup>;Ptch1<sup>fl/fl</sup> mice were treated with TAM at 8 weeks and dorsal skin was analyzed for *Gli1* mRNA expression 10 days post TAM with a focus on TDs. Left panels: Panoramas showing TDs in their tissue context. Right panels: Early placodes emerging from TDs clearly display active, canonical Hh signaling in the epithelium and stroma. (D) Gli1<sup>creERT2</sup>;R26<sup>Tom</sup>;Ptch1<sup>fl/fl</sup> mice were treated with TAM at 8 weeks and dorsal skin was analyzed for *Gli1* mRNA expression 5 weeks post TAM. Shown is a consecutive section of the HF in **Figure 4G**. Note that Tomato-tracing was visualized using an RFP-antibody (C-D). For stainings n = 2 mice (A, B, D); n = 1 mouse (C). TAM: tamoxifen. IFE: interfollicular epidermis. BF: bright field. Scale bars: 50 μm (C panorama), 25 μm (A-B, C insets and D).

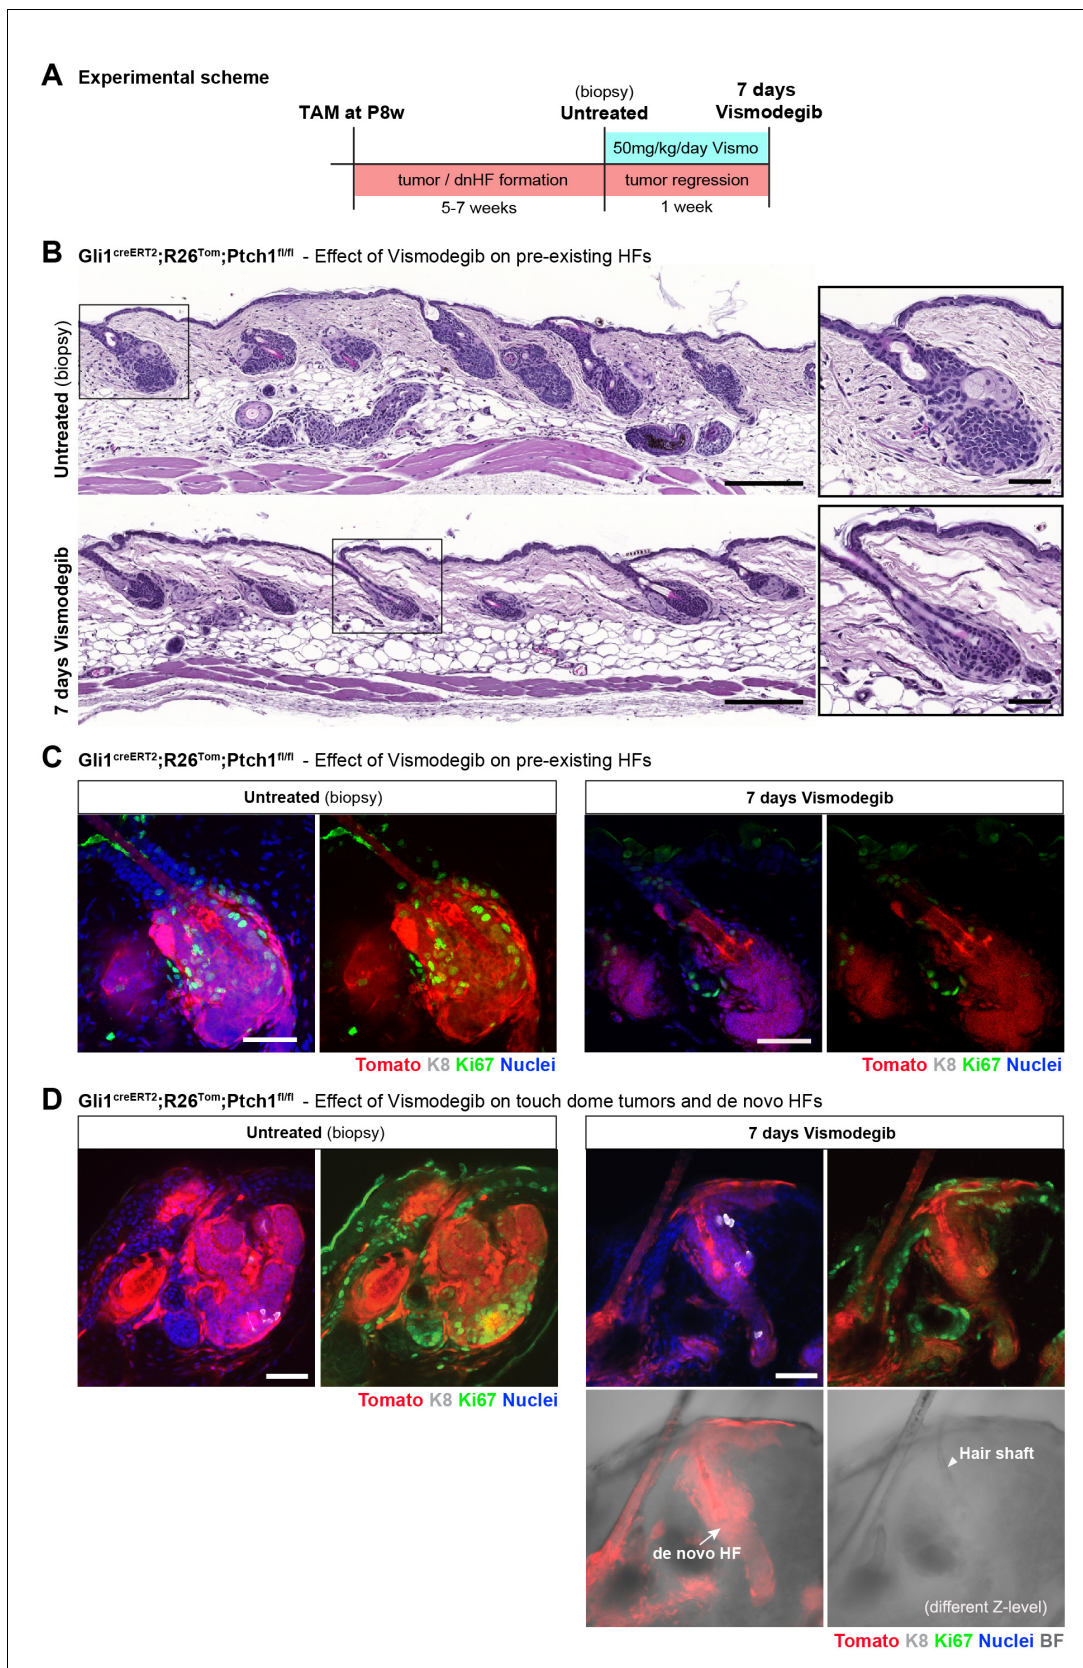

**Figure 5.** Established de novo hair follicles (HF) in touch domes (TDs) persist upon short-term vismodegib treatment. (A) Experimental scheme of vismodegib treatment. Gli1<sup>creERT2</sup>;R26<sup>Tom</sup>;Ptch1<sup>fl/fl</sup> mice were treated with tamoxifen (TAM) at 8 weeks of age. Five to seven weeks post TAM treatment, Figure 5 continued on next page

*Figure 5 continued*

when de novo HF were clearly established in the TDs, vismodegib was given daily for a week and dorsal skin was analyzed ( $n = 3$  mice for  $Gli1^{creERT2}; R26^{Tom}; Ptch1^{fl/fl}$ ,  $n = 1$  mouse for  $Gli1^{creERT2}; Ptch1^{fl/fl}$ ). (B) Hematoxylin and eosin stainings showing that basal cell carcinoma (BCC)-like lesions were considerably reduced in response to a week of daily vismodegib treatment at a dose of 50 mg/kg body weight. (C) Tumor-cell proliferation in bulge area of pre-existing HF assessed by Ki67 immunostaining. Bulge areas of untreated control biopsies showed high proliferation, which was almost entirely stalled in 7-day vismodegib samples; in the HF, only the sebaceous glands retained Ki67 expression. (D) BCC-like lesions were present in the TDs of dorsal biopsies taken prior to vismodegib treatment (left panel). In response to vismodegib, the tumor-growth area was considerably reduced while de novo HF persisted (arrow). The de novo HF are fully Tomato-traced and have a clearly visible hair shaft (arrowhead). HF: hair follicle. K8: marking TD area. Ki67: marking proliferating cells. TAM: tamoxifen. BF: bright field. Scale bars: 200  $\mu m$  (B panorama), 50  $\mu m$  (B inset, C, D).



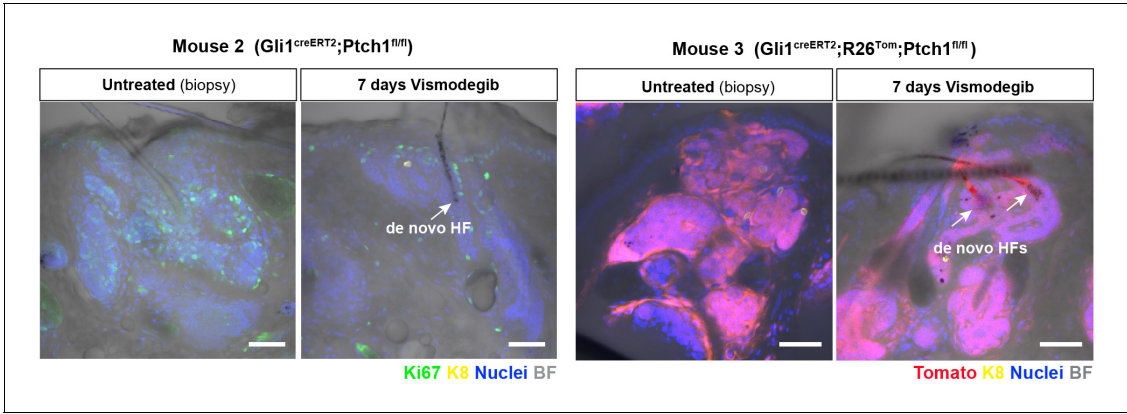

**Figure 5—figure supplement 1.** Effect of vismodegib on BCC-like lesions and de novo HF in TDs. Shown are two additional examples to **Figure 5D**. Arrowheads mark de novo HF. Scale bars: 50 μm.

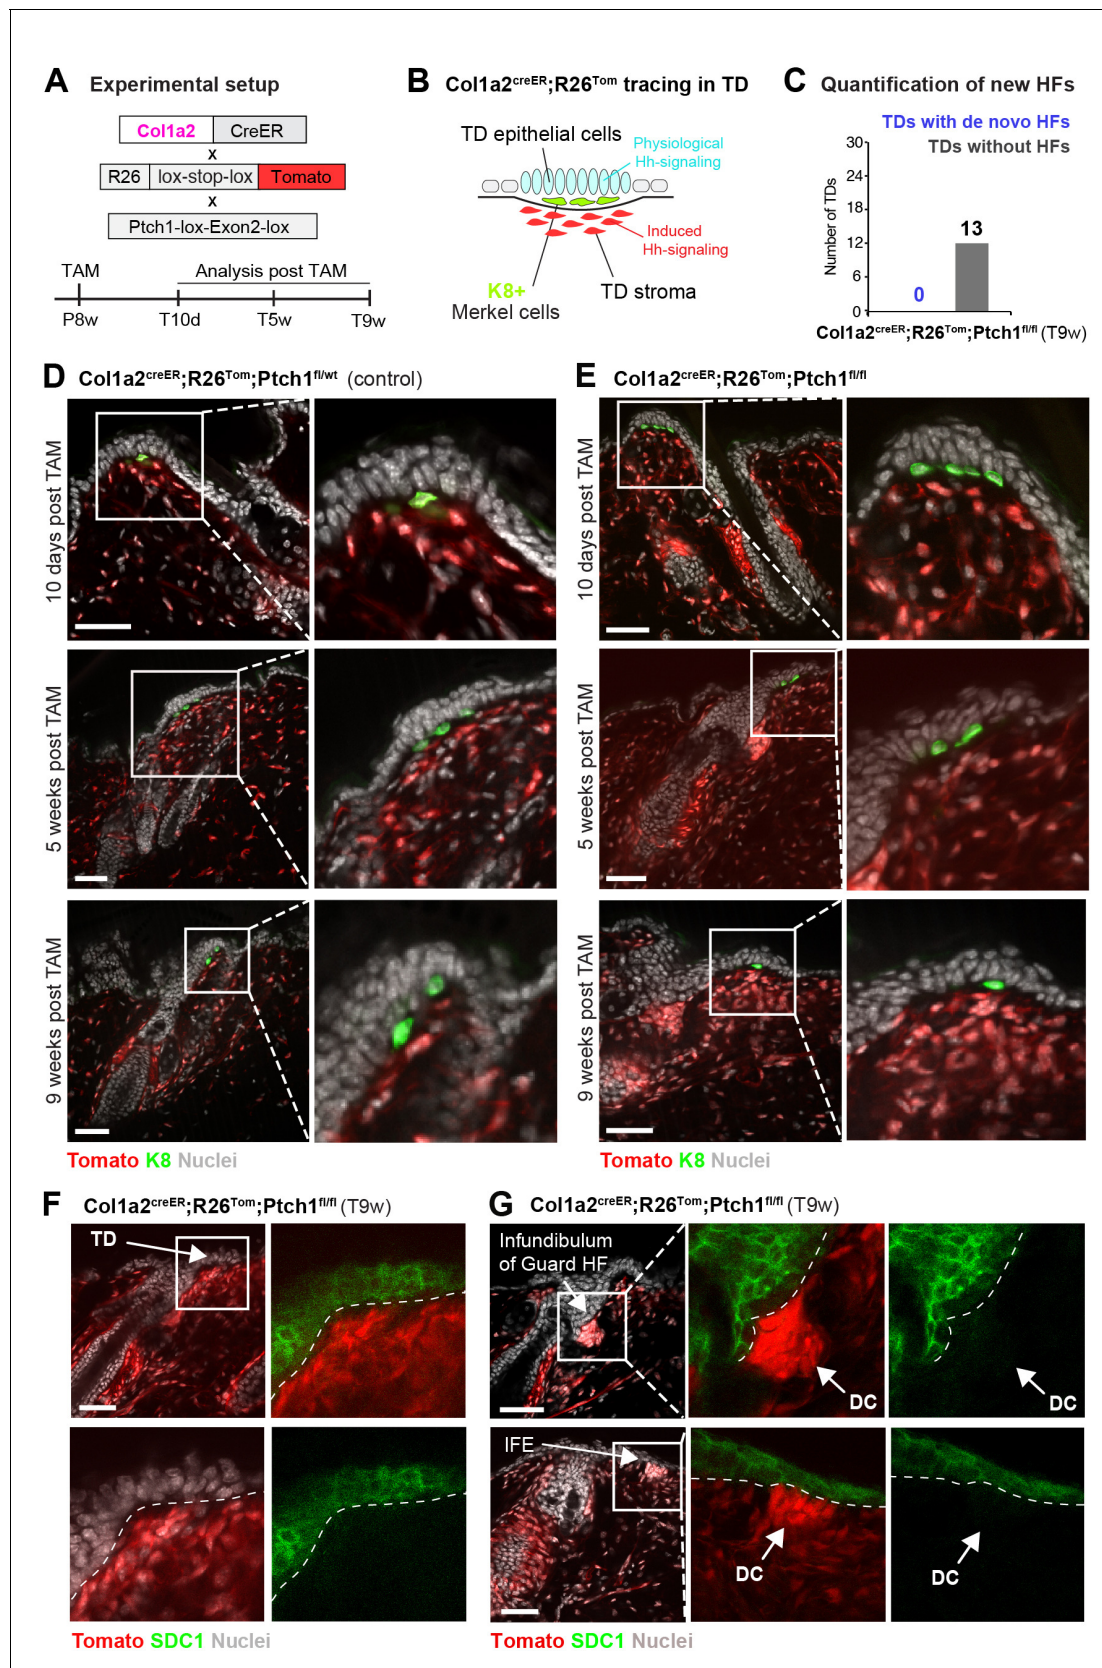

**Figure 6.** Stromal Hh pathway activation alone is not sufficient to induce hair follicle (HF) neogenesis in the touch domes (TDs) of Col1a2<sup>creER</sup>;R26<sup>Tom</sup>;Ptch1<sup>fl/fl</sup> skin. (A) Schematic representation of the Col1a2<sup>creER</sup>;R26<sup>Tom</sup>;Ptch1<sup>fl/fl</sup> mouse model and the experimental timeline. (B) Illustrative cartoon of Figure 6 continued on next page

## Figure 6 continued

Tomato-tracing of *Col1a2*-expressing cells and Hh-signaling levels in TD epithelium and TD stroma in this mouse model. (C) Quantification of de novo HFs in the TDs of *Col1a2<sup>creER</sup>;R26<sup>Tom</sup>;Ptch1<sup>fl/fl</sup>* mice treated with tamoxifen (TAM) at 8 weeks. Dorsal skin was analyzed 9 weeks post TAM treatment ( $n = 3$  mice). No de novo HFs were observed. (D–G) *Col1a2<sup>creER</sup>;R26<sup>Tom</sup>;Ptch1<sup>fl/fl</sup>* and *Col1a2<sup>creER</sup>;R26<sup>Tom</sup>;Ptch1<sup>fl/wt</sup>* control mice were treated with TAM at 8 weeks and dorsal skin was analyzed 10 days, 5 weeks, and 9 weeks after TAM treatment ( $n = 3$  mice per genotype and time point). (D) TDs of mice with heterozygous *Ptch1* deletion were phenotypically normal. (E) TDs of mice with homozygous *Ptch1* inactivation did not develop de novo HFs. Frequently, a higher cell density in stroma was observed. (F–G) Syndecan-1 (SDC1) staining was negative in the condensed stroma of TDs (F) as well as in dermal cell condensations (arrows) underneath the IFE and HF infundibula (G) in *Col1a2<sup>creER</sup>;R26<sup>Tom</sup>;Ptch1<sup>fl/fl</sup>* mice. TD: touch dome. HF: hair follicle. IFE: interfollicular epidermis. DC: dermal cell condensation. Scale bars: 50  $\mu\text{m}$  (D–G).

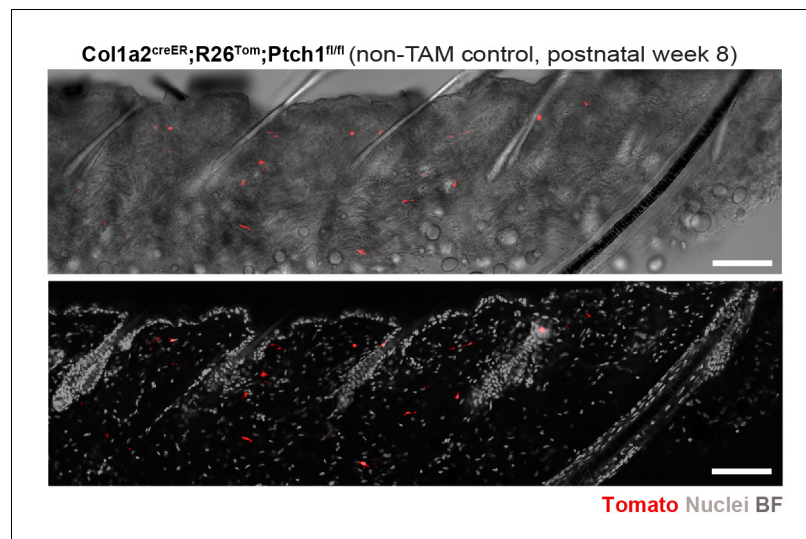

**Figure 6—figure supplement 1.** Leakiness in Col1a2<sup>creER</sup>;R26<sup>Tom</sup>;Ptch1<sup>fl/fl</sup> skin. A small number of Tomato-traced cells was present in non-tamoxifen treated Col1a2<sup>creER</sup>;R26<sup>Tom</sup>;Ptch1<sup>fl/fl</sup> mice at 8 weeks of age (i.e. start of tamoxifen treatment) (n = 2 mice). BF: bright field. Scale bars: 100  $\mu$ m.

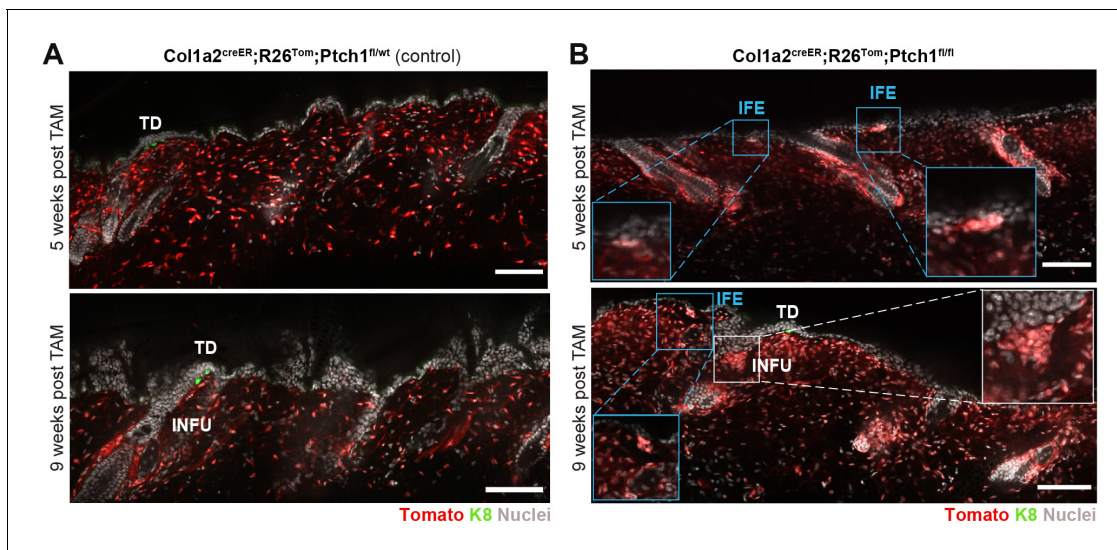

**Figure 6—figure supplement 2.** Stromal Hh-pathway activation in Col1a2<sup>creER</sup>;R26<sup>Tom</sup>;Ptch1<sup>fl/fl</sup> skin leads to dermal cell condensations. (A–B) Col1a2<sup>creER</sup>;R26<sup>Tom</sup>;Ptch1<sup>fl/fl</sup> mice and Col1a2<sup>creER</sup>;R26<sup>Tom</sup>;Ptch1<sup>fl/wt</sup> control mice were treated with TAM at 8 weeks of age and dorsal skin was analyzed 5 or 9 weeks after TAM treatment. Dermal cell condensations were not found in Col1a2<sup>creER</sup>;R26<sup>Tom</sup>;Ptch1<sup>fl/wt</sup> control skin (A) (n = 2 mice), but were frequently detected underneath the interfollicular epidermis (IFE) and HF-infundibulum (INFU) areas of Guard HFs in the skin of Col1a2<sup>creER</sup>;R26<sup>Tom</sup>;Ptch1<sup>fl/fl</sup> mice (B) (n = 3 mice). TD: touch dome. Scale bars: 100 μm.



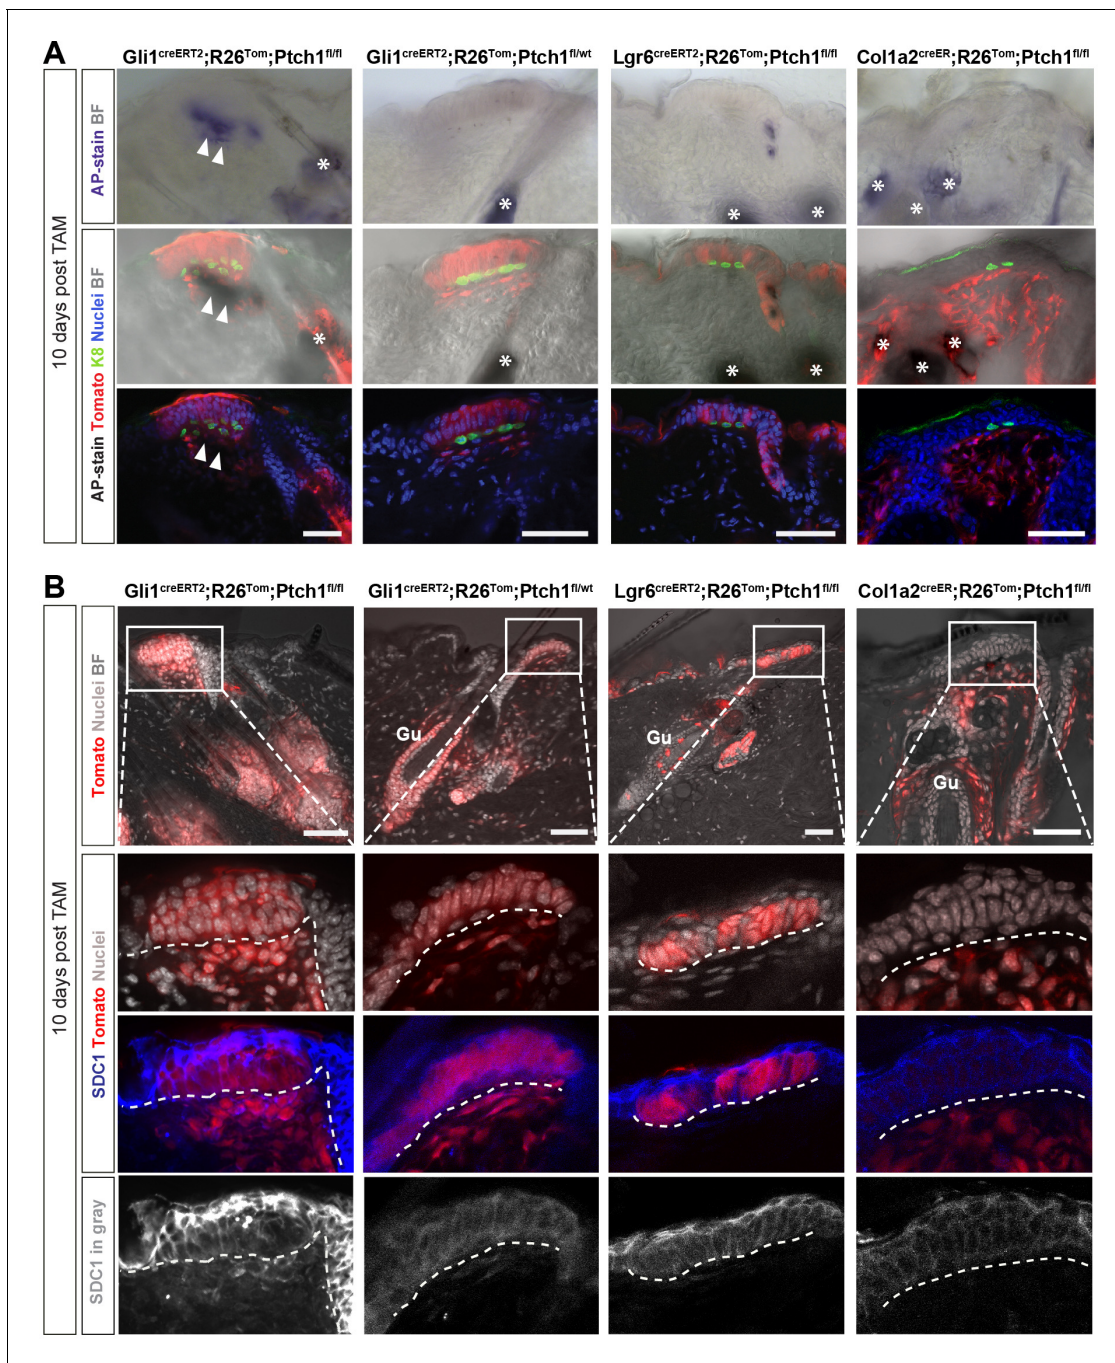

**Figure 7.** Expression of markers indicative for hair follicle (HF)-induction competent stroma in *Gli1<sup>creERT2</sup>;R26<sup>Tom</sup>;Ptch1<sup>fl/fl</sup>* touch domes (TDs). (A–B) Mice were treated with tamoxifen (TAM) at 8 weeks and dorsal skin was analyzed 10 days later using the alkaline phosphatase (AP) enzymatic assay (A; n = 2–3 mice per genotype) or Syndecan-1 (SDC1) immunofluorescence staining (B; n = 3 mice per genotype). (A) The TD stroma of *Gli1<sup>creERT2</sup>;R26<sup>Tom</sup>;Ptch1<sup>fl/fl</sup>* skin stained AP-positive, indicating pre-dermal condensate formation. Please note that the nuclear staining (DAPI) in the areas of AP-positive signal is present but very dim (quenched). The TD stroma in skin of *Gli1<sup>creERT2</sup>;R26<sup>Tom</sup>;Ptch1<sup>fl/wt</sup>*, *Lgr6<sup>creERT2</sup>;R26<sup>Tom</sup>;Ptch1<sup>fl/fl</sup>* and *Col1a2<sup>creER</sup>;R26<sup>Tom</sup>;Ptch1<sup>fl/fl</sup>* stained AP-negative. (B) TD stroma of *Gli1<sup>creERT2</sup>;R26<sup>Tom</sup>;Ptch1<sup>fl/fl</sup>* skin was clearly positive for SDC1 staining, while the TD stroma of *Gli1<sup>creERT2</sup>;R26<sup>Tom</sup>;Ptch1<sup>fl/wt</sup>* skin showed very weak to negative SDC1 staining. In the TDs of *Lgr6<sup>creERT2</sup>;R26<sup>Tom</sup>;Ptch1<sup>fl/fl</sup>* and *Col1a2<sup>creER</sup>;R26<sup>Tom</sup>;Ptch1<sup>fl/fl</sup>* skin, SDC1 staining was absent. Gu: Guard hair. TAM: tamoxifen. BF: bright field. Asterisks: sebaceous glands stain positive for AP. Arrowheads: positive AP-staining in TD stroma. Dashed line: epithelial-stroma border. Scale bars: 50  $\mu$ m (A–B).



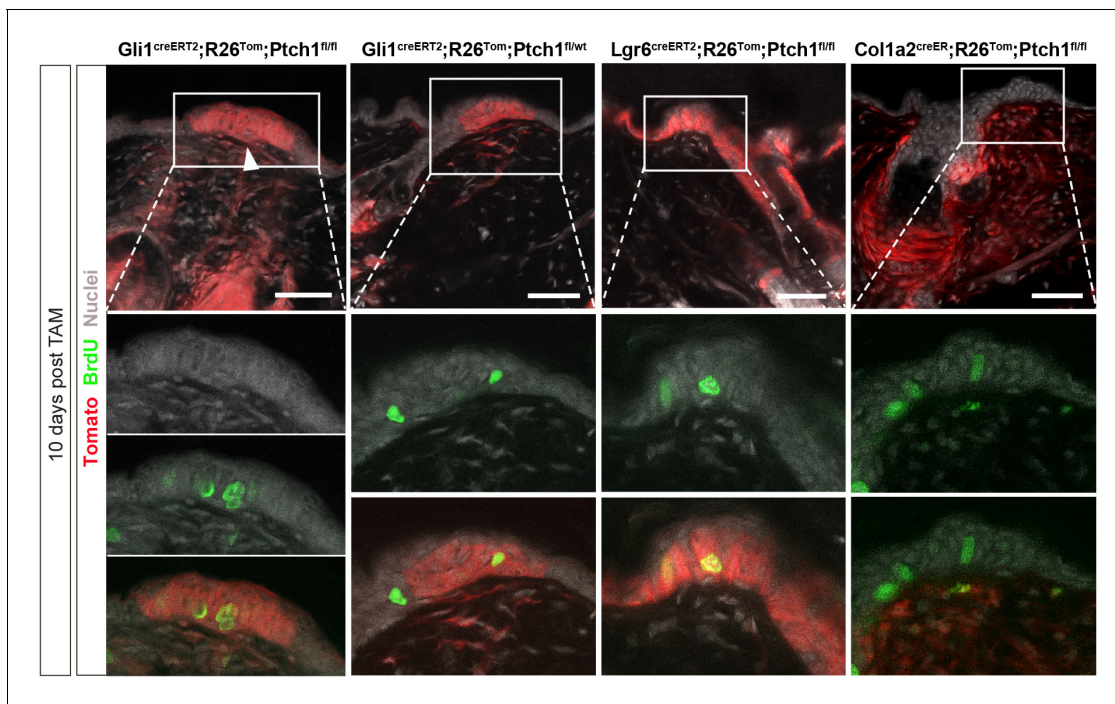

**Figure 7—figure supplement 1.** Capturing very early epithelial bud formation in TDs using BrdU incorporation. BrdU staining in TD areas. Mice were treated with TAM at 8 weeks of age and dorsal skin was collected 10 days after TAM treatment. Two hours prior to animal sacrifice, BrdU was given i.p. Clustered BrdU-positive cells were present in a potential developing TD-associated epithelial bud of  $Gli1^{creERT2};R26^{Tom};Ptch1^{fl/fl}$  skin (arrowhead). Fewer and non-clustered BrdU-positive cells were detected in the TDs of the  $Gli1^{creERT2};R26^{Tom};Ptch1^{fl/wt}$  control mice,  $Lgr6^{creERT2};R26^{Tom};Ptch1^{fl/fl}$ , and  $Col1a2^{creER};R26^{Tom};Ptch1^{fl/fl}$  mice. Note: HCl treatment for BrdU-staining results in more 'blurry' nuclei and loss of endogenous Tomato fluorescence. Tomato-tracing was visualized using an RFP antibody.  $n = 1$  mouse per genotype, except  $n = 2$  mice for  $Lgr6^{creERT2};R26^{Tom};Ptch1^{fl/fl}$ . BrdU: Bromodeoxyuridine; labels proliferating cells. Scale bars: 50  $\mu m$ .

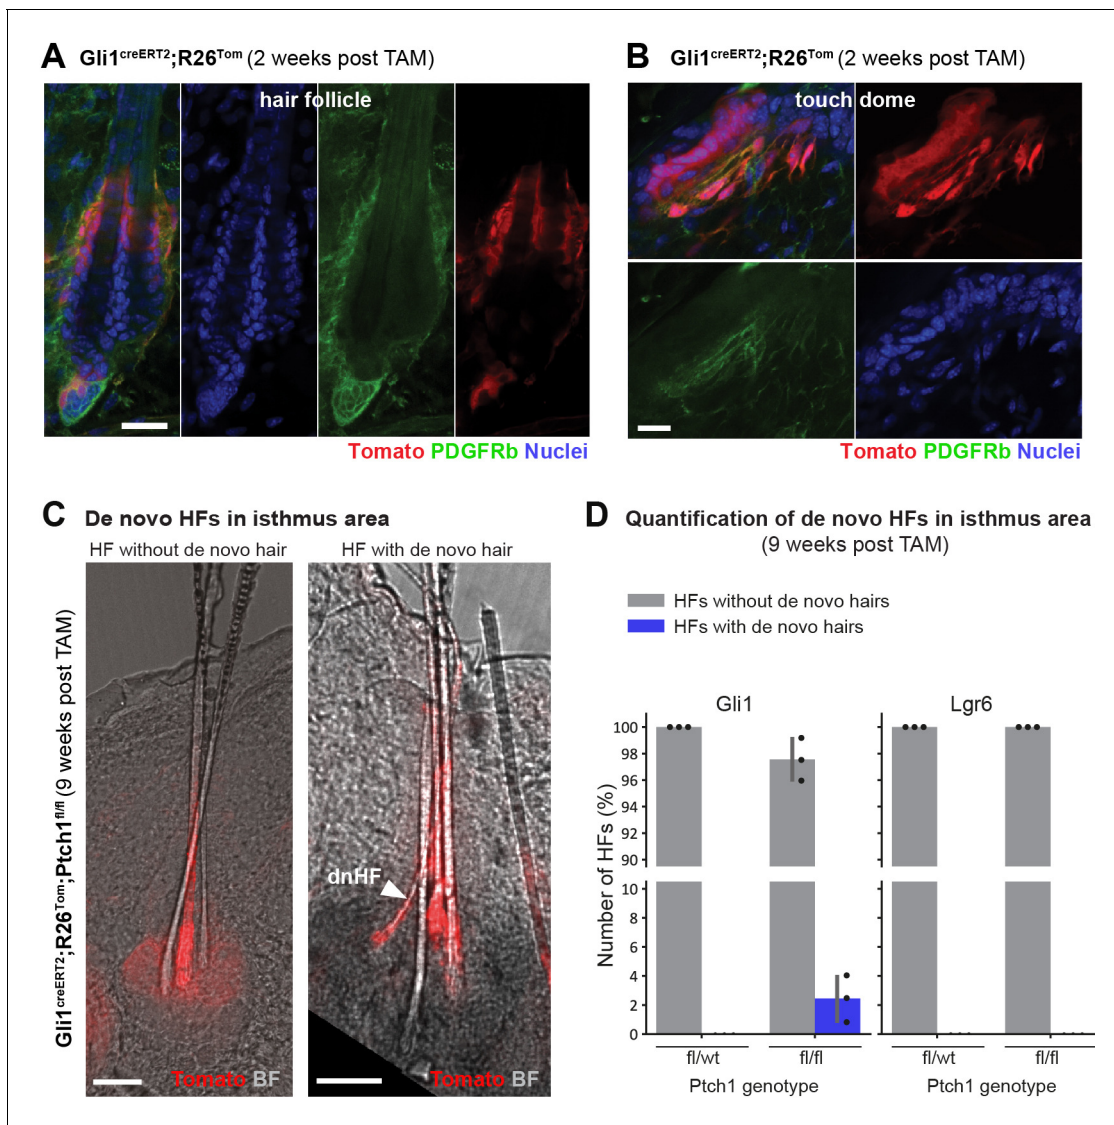

**Figure 8.** De novo hair follicle (HF) formation in isthmus area of pre-existing HFs. (A–B) PDGFRb (CD140b antibody) staining of Gli1<sup>creERT2</sup>;R26<sup>Tom</sup> mice, treated with tamoxifen (TAM) at 8 weeks of age and traced for 2 weeks. Tomato-traced PDGFRb+ stromal cells are present in the HF isthmus area (A) and in the touch dome (TD) (B). (C–D) Mice were treated with TAM at 8 weeks of age and dorsal skin was analyzed 9 weeks post TAM. (C) Gli1<sup>creERT2</sup>;R26<sup>Tom</sup>;Ptch1<sup>fl/fl</sup> dorsal skin. Left panel: HFs without de novo HF contain three hair shafts (3 rounds of anagen). Right panel: HFs with de novo HF often contain four hair shafts including one thinner hair shaft with bent shape (arrowhead). (D) Quantification of de novo HFs in the isthmus area of Gli1<sup>creERT2</sup>;R26<sup>Tom</sup>;Ptch1<sup>fl/fl</sup> (n = 668 HFs from n = 3 mice), Lgr6<sup>creERT2</sup>;R26<sup>Tom</sup>;Ptch1<sup>fl/fl</sup> (n = 207 HFs from n = 3 mice), Gli1<sup>creERT2</sup>;R26<sup>Tom</sup>;Ptch1<sup>fl/wt</sup> (n = 335 HFs from n = 3 mice) and Lgr6<sup>creERT2</sup>;R26<sup>Tom</sup>;Ptch1<sup>fl/wt</sup> (n = 83 HFs from n = 3 mice) (Figure 8—source data 1). De novo HFs were only detected in isthmus areas of Gli1<sup>creERT2</sup>;R26<sup>Tom</sup>;Ptch1<sup>fl/fl</sup> mice. p-value=0.09 (t-test comparing Gli1<sup>creERT2</sup>;R26<sup>Tom</sup>;Ptch1<sup>fl/fl</sup> and Gli1<sup>creERT2</sup>;R26<sup>Tom</sup>;Ptch1<sup>fl/wt</sup>). n = 3 mice (A–C). dnHF: de novo hair follicle. TAM: tamoxifen. BF: bright field. Scale bars: 20  $\mu$ m (A), 10  $\mu$ m (B), 50  $\mu$ m (C).



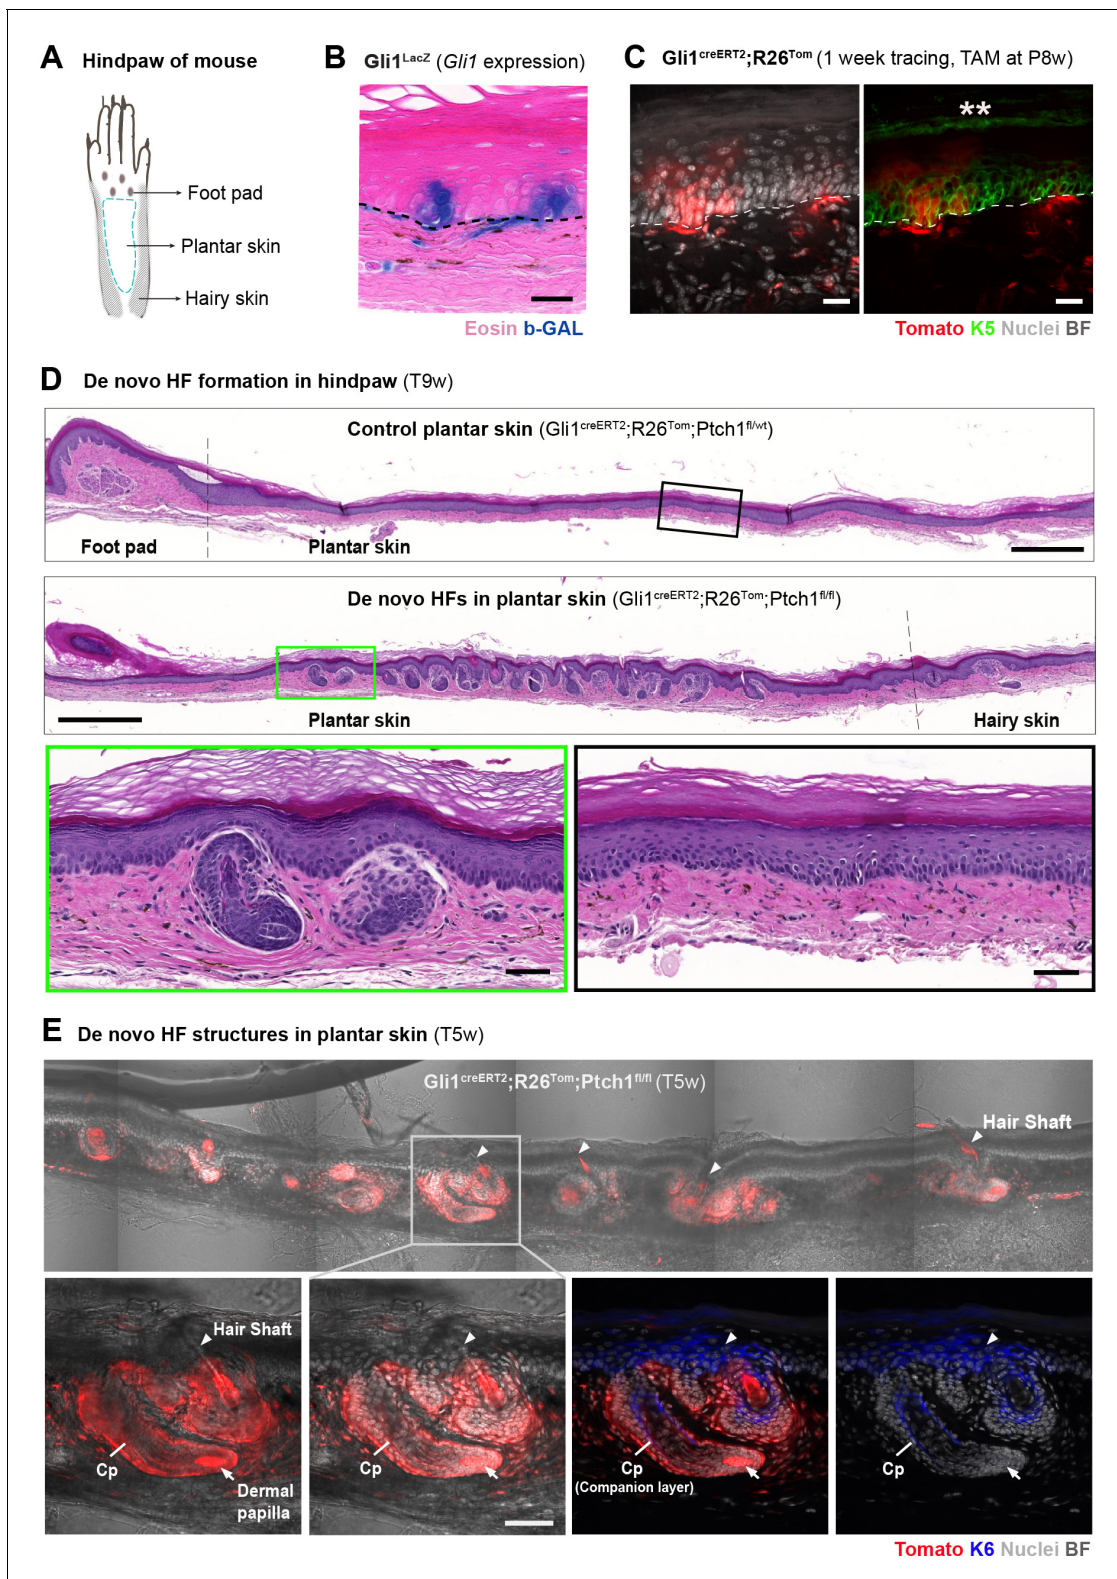

**Figure 9.** Formation of de novo hair follicles (HF) in the plantar skin of  $Gli1^{creERT2};R26^{Tom};Ptch1^{fl/fl}$  mice. (A) Illustrative cartoon of a mouse hindpaw. (B)  $Gli1^{LacZ}$  expression in the plantar skin (n = 3 mice). (C)  $Gli1^{creERT2};R26^{Tom}$  mice were treated with tamoxifen (TAM) at 8 weeks of age. The hindpaws were collected 1 week post TAM and immuno-stained with K5 antibody (n = 3 mice). Asterisks mark autofluorescence on the outermost keratinized layer. (D–E)  $Gli1^{creERT2};R26^{Tom};Ptch1^{fl/fl}$  and control  $Gli1^{creERT2};R26^{Tom};Ptch1^{fl/wt}$  mice were treated with TAM at 8 weeks of age. Hindpaws were collected 5 or 9 weeks post TAM (n = 3 mice for each genotype; except n = 2 for  $Gli1^{creERT2};R26^{Tom};Ptch1^{fl/wt}$  5 weeks post TAM). (D) Numerous de novo HF formed in plantar skin (T9w). (E) De novo HF structures in plantar skin (T5w).

Figure 9 continued on next page

*Figure 9 continued*

the plantar skin of  $Gli1^{creERT2};R26^{Tom};Ptch1^{fl/fl}$  mice, while the same skin region in the control mice remained phenotypically normal. Green and black frames: zoom-in of plantar epidermis. Hematoxylin and eosin stained. (E) De novo HF structure in plantar skin of  $Gli1^{creERT2};R26^{Tom};Ptch1^{fl/fl}$  mice are fully Tomato-traced and contain a K6+ companion layer as well as hair shafts ( $n = 2$  mice). Arrowheads: de novo hair shafts. Arrows: dermal papilla. Cp: companion layer. Dashed line: epithelial-stromal border. TAM: tamoxifen. BF: bright field. Scale bars: 20  $\mu m$  (B–C), 500  $\mu m$  (D panoramas), 50  $\mu m$  (D, E insets).

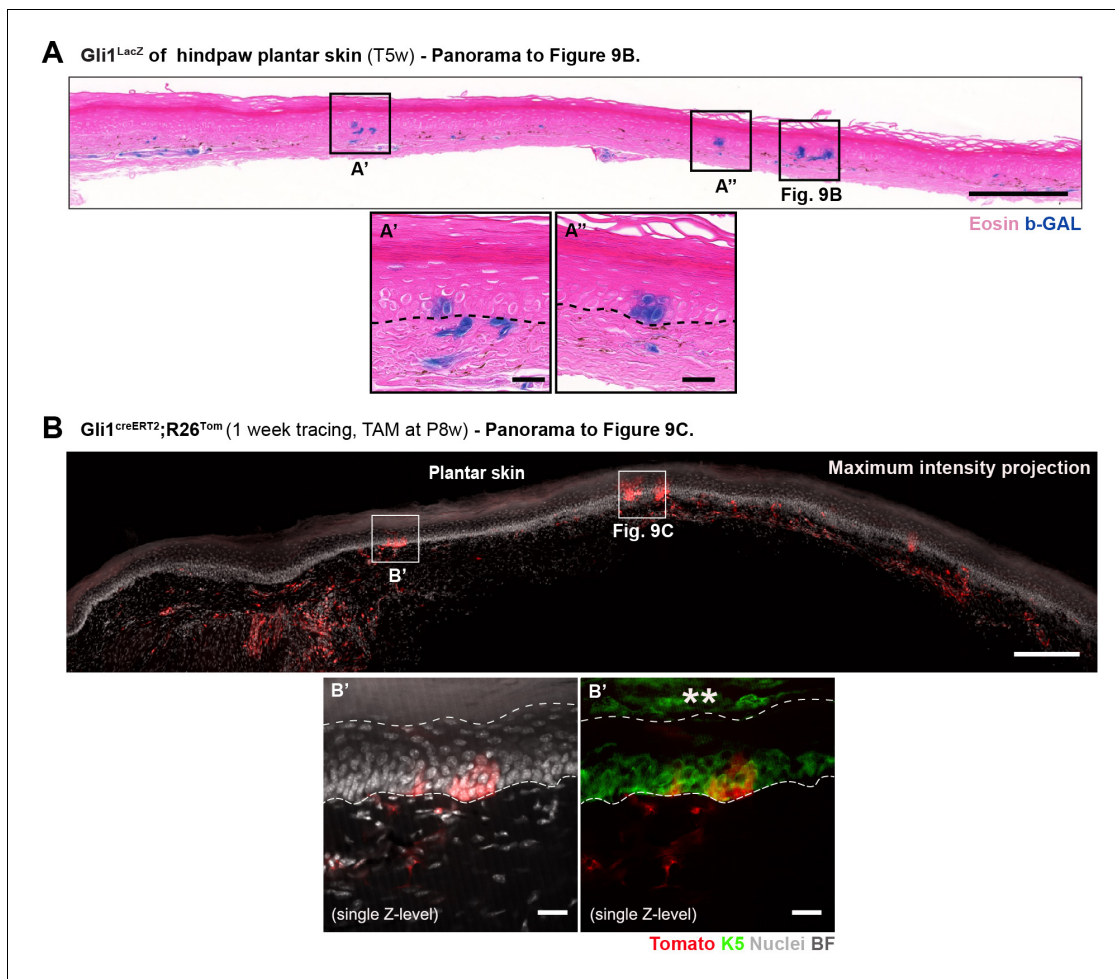

**Figure 9—figure supplement 1.** Physiological Hh/Gli signaling in the hindpaw plantar skin. (A) *Gli1*<sup>LacZ</sup> expression in the plantar skin epidermis and dermis (n = 3 mice). Insets show *Gli1*-expressing cells at higher magnification. Dashed lines indicate the border between epidermis and dermis. (B) *Gli1*<sup>creERT2</sup>;R26<sup>Tom</sup> mice were treated with TAM at 8 weeks and traced for a week (n = 3 mice). Hindpaw skin was collected and immunostained with K5 antibody. Upper panel: maximum intensity projection of Tomato-tracing pattern in plantar skin. Lower panel: details of frame B' (a single z-level is shown). Asterisks mark auto-fluorescence of the outermost keratinized layer. TAM: tamoxifen. BF: bright field. Scale bars: 200  $\mu$ m (Panorama in A and B), 20  $\mu$ m (Insets A',A'',B').



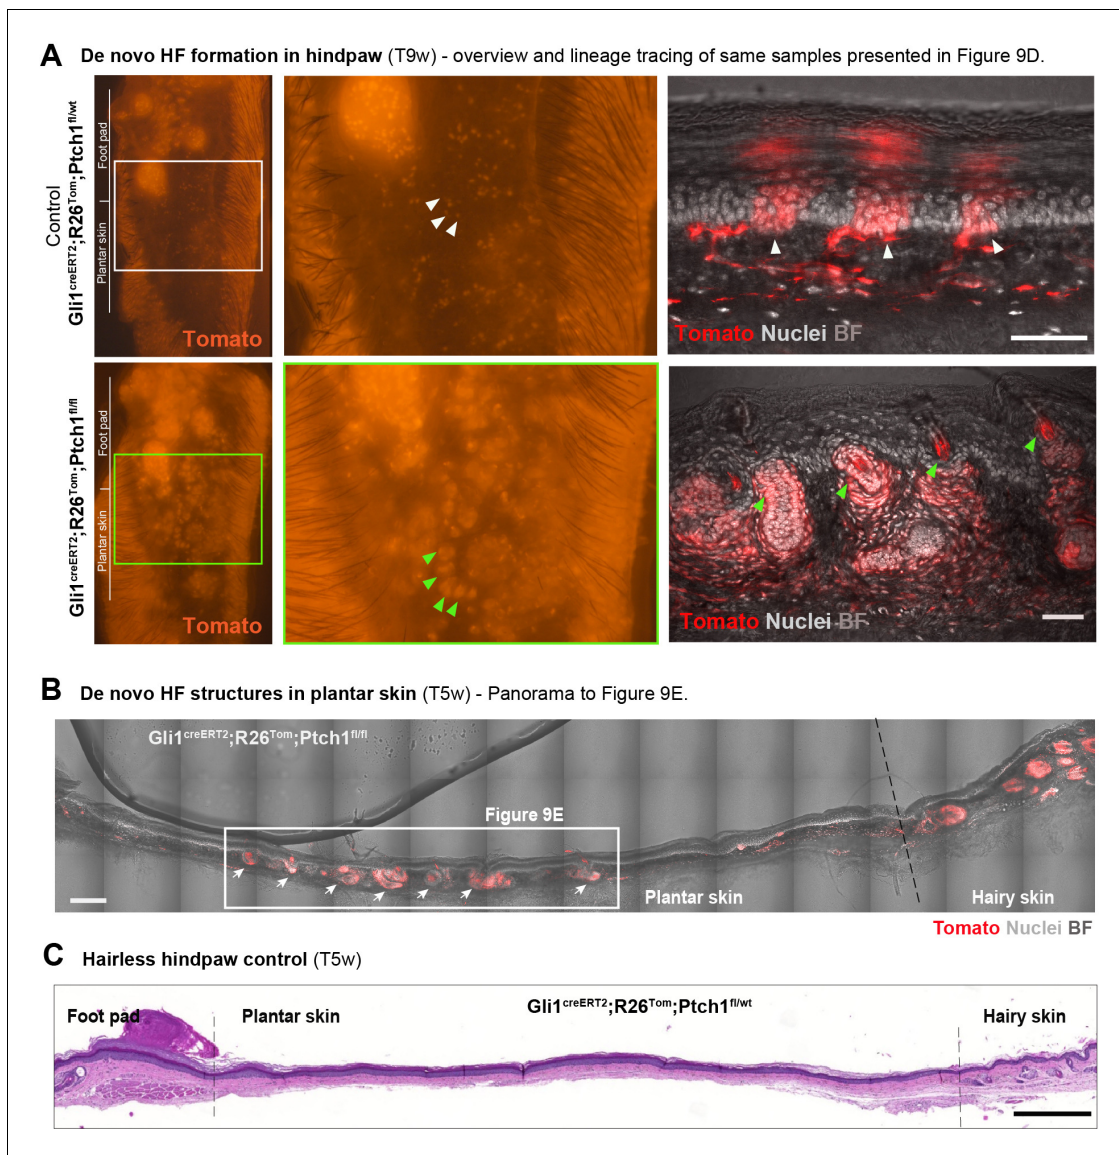

**Figure 9—figure supplement 2.** De novo HF formation in hindpaw of Gli1<sup>creERT2</sup>;R26<sup>Tom</sup>;Ptch1<sup>fl/fl</sup> mice. (A–C) Gli1<sup>creERT2</sup>;R26<sup>Tom</sup>;Ptch1<sup>fl/fl</sup> and control Gli1<sup>creERT2</sup>;R26<sup>Tom</sup>;Ptch1<sup>fl/wt</sup> mice were treated with TAM at 8 weeks of age. The hindpaws were collected 5 or 9 weeks post TAM (n = 3 mice for each genotype). (A) Overview images of Tomato fluorescence in paws acquired with a stereo microscope (left panels) and lineage tracing pattern (right panels) of the same samples that were presented in **Figure 9D**. While in plantar skin of the control mice only Gli1-traced IFE cell clusters were present (white arrowheads), numerous de novo HFs with hair shafts formed in the plantar skin of Gli1<sup>creERT2</sup>;R26<sup>Tom</sup>;Ptch1<sup>fl/fl</sup> mice 9 weeks post TAM (green arrowheads). (B) Panorama to **Figure 9E**: de novo HF structures in plantar skin. Arrows: de novo HFs. (C) The control plantar skin shows no signs of de novo HF formation 5 weeks after TAM treatment. TAM: tamoxifen. BF: bright field. Scale bars: 50 μm (A), 200 μm (B), 500 μm (C).
