# Supplementary material for: Coordinated hedgehog signaling induces new hair follicles in adult skin
Source: eLife. 2020 Mar 17;9:e46756. doi: 10.7554/eLife.46756 (PMC7077985; doi:10.7554/eLife.46756)
Supplement: Supplementary file 1. — Given are the following details per mouse: mouse genotype, treatment, analysis time point, tissue sampling (biopsy or final material), comments/observations, mouse ID. [file elife-46756-supp1.xlsx]

## Sheet: Sun et al.
List of mouse experiments (Sun et al.)
Samples are ordered primarliy according to analysis time point (9wk-5wk-10d-additional time points) and secondary according to mouse genotype.
Gli1 mouse models - dorsal skin
Mouse genotype	Treatment	Analysis timepoint post Tamoxifen (TAM)	Tissue sampling (biopsy or final material)	Comments/observations	Mouse ID
Gli1crehet-Tomatohet-PtchCondhomo	TAM at 8 weeks (3mg ip.)	9wk - 59d	final	TD: De novo HFs / BCC growth; pre-existing HFs: BCC growth	MK 168:1
Gli1crehet-Tomatohet-PtchCondhomo	TAM at 8 weeks (2x3mg ip.)	9wk - 63d	final	TD: De novo HFs / BCC growth; pre-existing HFs: BCC growth	MK 154:2
Gli1crehet-Tomatohet-PtchCondhomo	TAM at 8 weeks (2x3mg ip.)	9wk - 63d	final	TD: De novo HFs / BCC growth; pre-existing HFs: BCC growth	MK 284:2
Gli1crehet-Tomatohet-PtchCondhomo	TAM at 8 weeks (2x3mg ip.)	9wk - 64d	final	TD: De novo HFs / BCC growth; pre-existing HFs: BCC growth	MK 168:8
Gli1crehet-Tomatohet-PtchCondhomo	non-TAM-treated control	9wk - 63d	final	Pre-existing HFs: some BCC growth	MK 168:3
Gli1crehet-Tomatohet-PtchCondhet	TAM at 8 weeks (2x3mg ip.)	9wk - 63d	final	No obvious difference to wt skin	MK 284:6
Gli1crehet-Tomatohet-PtchCondhet	TAM at 8 weeks (2x3mg ip.)	9wk - 63d	final	No obvious difference to wt skin	MK 168:4
Gli1crehet-Tomatohet-PtchCondhet	TAM at 8 weeks (2x3mg ip.)	9wk - 63d	final	No obvious difference to wt skin	MK 154:3
Gli1crehet-Tomatohet-PtchCondhet	non-TAM-treated control	9wk - 63d	final	No obvious difference to wt skin	MK 154:1
Gli1crehet-Tomatohet-PtchCondhet	TAM at 8 weeks (2x3mg ip.)	9wk - 63d	final	No obvious difference to wt skin	MK 154:5
Gli1crehet-Tomatohet-PtchCondhet	TAM at 8 weeks (2x3mg ip.)	9wk - 64d	final	No obvious difference to wt skin	MK 168:6
Tomatohet-PtchCondhomo	TAM at 8 weeks (2x3mg ip.)	9wk - 63d	final	No obvious difference to wt skin	MK 168:7
Tomatohet-PtchCondhet	TAM at 8 weeks (3mg ip.)	9wk - 63d	final	No obvious difference to wt skin	MK 168:2
Tomatohet-PtchCondhet	TAM at 8 weeks (2x3mg ip.)	9wk - 63d	final	No obvious difference to wt skin	MK 154:4
Gli1crehet-Tomatohet-PtchCondhomo	TAM at 8 weeks (2x3mg ip.)	5wk - 33d	biopsy	TD: De novo HFs / BCC growth; pre-existing HFs: BCC growth	MK 284:2
Gli1crehet-Tomatohet-PtchCondhomo	TAM at 8 weeks (2x3mg ip.)	5wk - 33d	final	TD: De novo HFs / BCC growth; pre-existing HFs: BCC growth	MK 282:7
Gli1crehet-Tomatohet-PtchCondhomo	TAM at 8 weeks (2x3mg ip.)	5wk - 35d	biopsy	TD: De novo HFs / BCC growth; pre-existing HFs: BCC growth	MK 154:2
Gli1crehet-Tomatohet-PtchCondhomo	TAM at 8 weeks (2x3mg ip.)	5wk - 35d	biopsy	TD: De novo HFs / BCC growth; pre-existing HFs: BCC growth	MK 168:1
Gli1crehet-Tomatohet-PtchCondhomo	TAM at 8 weeks (2x3mg ip.)	5wk - 35d	biopsy	TD: De novo HFs / BCC growth; pre-existing HFs: BCC growth	MK 168:8
Gli1crehet-Tomatohet-PtchCondhomo	non TAM-treated control	5wk - 35d	biopsy	Pre-existing HFs: some BCC growth	MK 168:3
Gli1crehet-Tomatohet-PtchCondhomo	TAM at 8 weeks (2x3mg ip.)	5wk - 36d	final	TD: De novo HFs / BCC growth; pre-existing HFs: BCC growth	MK 282:3
Gli1crehet-Tomatohet-PtchCondhet	TAM at 8 weeks (2x3mg ip.)	5wk - 33d	final	No obvious difference to wt skin	MK 284:5
Gli1crehet-Tomatohet-PtchCondhet	non TAM-treated control	5wk - 35d	biopsy	No obvious difference to wt skin	MK 154:1
Gli1crehet-Tomatohet-PtchCondhet	TAM at 8 weeks (2x3mg ip.)	5wk - 35d	biopsy	No obvious difference to wt skin	MK 154:3
Gli1crehet-Tomatohet-PtchCondhet	TAM at 8 weeks (2x3mg ip.)	5wk - 35d	biopsy	No obvious difference to wt skin	MK 154:5
Gli1crehet-Tomatohet-PtchCondhet	TAM at 8 weeks (2x3mg ip.)	5wk - 35d	biopsy	No obvious difference to wt skin	MK 168:4
Gli1crehet-Tomatohet-PtchCondhet	TAM at 8 weeks (2x3mg ip.)	5wk - 35d	biopsy	No obvious difference to wt skin	MK 168:6
Tomatohet-PtchCondhomo	non TAM-treated control	5wk - 35d	biopsy	No obvious difference to wt skin	MK 168:5
Tomatohet-PtchCondhomo	TAM at 8 weeks (2x3mg ip.)	5wk - 35d	biopsy	No obvious difference to wt skin	MK 168:7
Tomatohet-PtchCondhet	TAM at 8 weeks (2x3mg ip.)	5wk - 33d	final	No obvious difference to wt skin	MK 284:3
Tomatohet-PtchCondhet	TAM at 8 weeks (2x3mg ip.)	5wk - 35d	biopsy	No obvious difference to wt skin	MK 154:4
Tomatohet-PtchCondhet	TAM at 8 weeks (3mg ip.)	5wk - 35d	biopsy	No obvious difference to wt skin	MK 168:2
Gli1crehet-Tomatohet-PtchCondhomo	TAM at 8 weeks (2x3mg ip.)	10d	biopsy	TD: epithelial buds in some TDs; pre-existing HFs: epithelial proliferations/buds	MK 154:2
Gli1crehet-Tomatohet-PtchCondhomo	TAM at 8 weeks (2x3mg ip.)	10d	biopsy	TD: epithelial buds in some TDs; pre-existing HFs: epithelial proliferations/buds	MK 168:1
Gli1crehet-Tomatohet-PtchCondhomo	TAM at 8 weeks (2x3mg ip.)	10d	biopsy	TD: epithelial buds in some TDs; pre-existing HFs: epithelial proliferations/buds	MK 168:8
Gli1crehet-Tomatohet-PtchCondhomo	TAM at 8 weeks (2x3mg ip.)	10d	final	TD: epithelial buds in some TDs; pre-existing HFs: epithelial proliferations/buds	MK 299:1
Gli1crehet-Tomatohet-PtchCondhomo	non TAM-treated control	10d	biopsy	Pre-existing HFs: some BCC growth	MK 168:3
Gli1crehet-Tomatohet-PtchCondhet	TAM at 8 weeks (2x3mg ip.)	10d	final	No obvious difference to wt skin	MK 298:1
Gli1crehet-Tomatohet-PtchCondhet	TAM at 8 weeks (2x3mg ip.)	10d	biopsy	No obvious difference to wt skin	MK 154:3
Gli1crehet-Tomatohet-PtchCondhet	TAM at 8 weeks (2x3mg ip.)	10d	biopsy	No obvious difference to wt skin	MK 154:5
Gli1crehet-Tomatohet-PtchCondhet	non TAM-treated control	10d	biopsy	No obvious difference to wt skin	MK 154:1
Gli1crehet-Tomatohet-PtchCondhet	TAM at 8 weeks (2x3mg ip.)	10d	biopsy	No obvious difference to wt skin	MK 168:4
Gli1crehet-Tomatohet-PtchCondhet	TAM at 8 weeks (2x3mg ip.)	10d	biopsy	No obvious difference to wt skin	MK 168:6
Tomatohet-PtchCondhomo	non TAM-treated control	10d	biopsy	No obvious difference to wt skin	MK 168:5
Tomatohet-PtchCondhomo	TAM at 8 weeks (2x3mg ip.)	10d	biopsy	No obvious difference to wt skin	MK 168:7
Tomatohet-PtchCondhet	TAM at 8 weeks (2x3mg ip.)	10d	biopsy	No obvious difference to wt skin	MK 154:4
Tomatohet-PtchCondhet	TAM at 8 weeks (3mg ip.)	10d	biopsy	No obvious difference to wt skin	MK 168:2
Gli1crehet-Tomatohet-PtchCondhomo	TAM at 8 weeks (2x3mg ip.)	53d	biopsy	TD: De novo HFs / BCC growth; pre-existing HFs: BCC growth	MK 284:2
Gli1crehet-Tomatohet-PtchCondhomo	TAM at 8 weeks (2x3mg ip.)	29d	final	TD: De novo HFs / BCC growth; pre-existing HFs: BCC growth	MK 282:6
Gli1crehet-Tomatohet-PtchCondhomo	TAM at 8 weeks (2x3mg ip.)	27d	biopsy	TD: De novo HFs / BCC growth; pre-existing HFs: BCC growth	MK 282:3
Gli1crehet-Tomatohet-PtchCondhomo	TAM at 8 weeks (2x3mg ip.)	27d	biopsy	TD: HF buds only or HF buds / BCC growth; pre-existing HFs: BCC growth	MK 282:7
Gli1crehet-Tomatohet-PtchCondhomo	TAM at 8 weeks (2x3mg ip.)	27d	final	TD: HF buds only or HF buds / BCC growth; pre-existing HFs: BCC growth	MK 287:1
Gli1crehet-Tomatohet-PtchCondhomo	TAM at 8 weeks (2x3mg ip.)	25d	biopsy	TD: De novo HFs / BCC growth; pre-existing HFs: BCC growth	MK 287:1
Gli1crehet-Tomatohet-PtchCondhomo	TAM at 8 weeks (2x3mg ip.)	17d	final	TD: De novo HFs / some BCC growth; pre-existing HFs: BCC growth	MK 306:1
Gli1crehet-Tomatohet-PtchCondhet	TAM at 8 weeks (2x3mg ip.)	30d	final	No obvious difference to wt skin	MK 284:1
Gli1crehet-Tomatohet-PtchCondhet	TAM at 8 weeks (2x3mg ip.)	30d	final	No obvious difference to wt skin	MK 284:8
Gli1crehet-Tomatohet-PtchCondhet	TAM at 8 weeks (2x3mg ip.)	27d	biopsy	No obvious difference to wt skin	MK 284:5
Gli1crehet-Tomatohet-PtchCondhet	TAM at 8 weeks (2x3mg ip.)	27d	biopsy	No obvious difference to wt skin	MK 284:8
Gli1crehet-Tomatohet-PtchCondhet	TAM at 8 weeks (2x3mg ip.)	27d	final	No obvious difference to wt skin	MK 287:2
Gli1crehet-Tomatohet-PtchCondhet	TAM at 8 weeks (2x3mg ip.)	25d	biopsy	No obvious difference to wt skin	MK 287:2
Gli1crehet-Tomatohet-PtchCondhet	TAM at 8 weeks (2x3mg ip.)	17d	final	No obvious difference to wt skin	MK 306:3
Tomatohet-PtchCondhomo	TAM at 8 weeks (2x3mg ip.)	30d	final	No obvious difference to wt skin	MK 282:1
Tomatohet-PtchCondhet	TAM at 8 weeks (2x3mg ip.)	27d	final	No obvious difference to wt skin	MK 282:2
Tomatohet-PtchCondhet	TAM at 8 weeks (2x3mg ip.)	27d	final	No obvious difference to wt skin	MK 288:1
Tomatohet-PtchCondhet	TAM at 8 weeks (2x3mg ip.)	25d	biopsy	No obvious difference to wt skin	MK 288:1
Tomatohet-PtchCondhet	TAM at 8 weeks (2x3mg ip.)	17d	final	No obvious difference to wt skin	MK 306:2
Gli1 mouse models - hindpaw
Mouse genotype	Treatment	Analysis timepoint post Tamoxifen (TAM)	Tissue sampling (biopsy or final material)	Comments/observations	Mouse ID
Gli1crehet-Tomatohet-PtchCondhomo	TAM at 8 weeks (2x3mg ip.)	62d	final	Many de novo HFs throughout the plantar hairless skin; no obvious BCC-growth	MK 284:2
Gli1crehet-Tomatohet-PtchCondhomo	TAM at 8 weeks (2x3mg ip.)	65d	final	Many de novo HFs throughout the plantar hairless skin; no obvious BCC-growth	MK 336:2
Gli1crehet-Tomatohet-PtchCondhomo	TAM at 8 weeks (2x3mg ip.)	59d	final	Many de novo HFs throughout the plantar hairless skin; no obvious BCC-growth	MK 320:2
Gli1crehet-Tomatohet-PtchCondhet	TAM at 8 weeks (2x3mg ip.)	62d	final	No obvious difference to wt skin	MK 284:6
Gli1crehet-Tomatohet-PtchCondhet	TAM at 8 weeks (2x3mg ip.)	65d	final	No obvious difference to wt skin	MK 338:1
Gli1crehet-Tomatohet-PtchCondhet	TAM at 8 weeks (2x3mg ip.)	65d	final	No obvious difference to wt skin	MK 338:5
Tomatohet-PtchCondhet	TAM at 8 weeks (2x3mg ip.)	59d	final	No obvious difference to wt skin	MK 320:1
Gli1crehet-Tomatohet-PtchCondhomo	TAM at 8 weeks (2x3mg ip.)	36d	final	Many de novo HFs throughout the plantar hairless skin; no obvious BCC-growth	MK 316:2
Gli1crehet-Tomatohet-PtchCondhomo	TAM at 8 weeks (2x3mg ip.)	36d	final	Many de novo HFs throughout the plantar hairless skin; no obvious BCC-growth	MK 282:3
Gli1crehet-Tomatohet-PtchCondhomo	TAM at 8 weeks (2x3mg ip.)	33d	final	Many de novo HFs throughout the plantar hairless skin; no obvious BCC-growth	MK 282:7
Gli1crehet-Tomatohet-PtchCondhet	TAM at 8 weeks (2x3mg ip.)	36d	final	No obvious difference to wt skin	MK 316:3
Gli1crehet-Tomatohet-PtchCondhet	TAM at 8 weeks (2x3mg ip.)	33d	final	No obvious difference to wt skin	MK 284:5
Tomatohet-PtchCondhomo	TAM at 8 weeks (2x3mg ip.)	36d	final	No obvious difference to wt skin	MK 316:1
Tomatohet-PtchCondhet	TAM at 8 weeks (2x3mg ip.)	33d	final	No obvious difference to wt skin	MK 284:3
Gli1crehet-Tomatohet-PtchCondhomo	TAM at 8 weeks (2x3mg ip.)	29d	final	Many de novo HFs throughout the plantar hairless skin; no obvious BCC-growth	MK 282:6
Gli1crehet-Tomatohet-PtchCondhomo	TAM at 8 weeks (2x3mg ip.)	27d	final	Many epithelial buds with dermal condensates in the plantar hairless skin	MK 287:1
Gli1crehet-Tomatohet-PtchCondhomo	TAM at 8 weeks (2x3mg ip.)	17d	final	Very few eptiehlial buds/proliferation	MK 306:1
Gli1crehet-Tomatohet-PtchCondhomo	TAM at 8 weeks (2x3mg ip.)	10d	final	No obvious difference to wt skin	MK 299:1
Gli1crehet-Tomatohet-PtchCondhet	TAM at 8 weeks (2x3mg ip.)	27d	final	No obvious difference to wt skin	MK 287:2
Gli1crehet-Tomatohet-PtchCondhet	TAM at 8 weeks (2x3mg ip.)	17d	final	No obvious difference to wt skin	MK 306:3
Gli1crehet-Tomatohet-PtchCondhet	TAM at 8 weeks (2x3mg ip.)	10d	final	No obvious difference to wt skin	MK 298:1
Tomatohet-PtchCondhet	TAM at 8 weeks (2x3mg ip.)	29d	final	No obvious difference to wt skin	MK 282:2
Tomatohet-PtchCondhet	TAM at 8 weeks (2x3mg ip.)	27d	final	No obvious difference to wt skin	MK 288:1
Tomatohet-PtchCondhet	TAM at 8 weeks (2x3mg ip.)	17d	final	No obvious difference to wt skin	MK 306:2
Gli1crehet-Tomatohet	TAM at 8 weeks (2x3mg ip.)	7d	final	Gli1-traced epithelial and stromal clusters in plantar hairless skin	XS 173:4
Gli1crehet-Tomatohet	TAM at 8 weeks (2x3mg ip.)	7d	final	Gli1-traced epithelial and stromal clusters in plantar hairless skin	XS 173:7
Gli1crehet-Tomatohet	TAM at 8 weeks (2x3mg ip.)	7d	final	Gli1-traced epithelial and stromal clusters in plantar hairless skin	XS 173:9
Gli1LacZ	non TAM-treated / p5w		final	B-gal stained epithelial and stromal clusters in plantar hairless skin	XS 130:1
Gli1LacZ	non TAM-treated / p8w		final	B-gal stained epithelial and stromal clusters in plantar hairless skin	KL 4:3
Gli1LacZ	non TAM-treated / p8w		final	B-gal stained epithelial and stromal clusters in plantar hairless skin	KL 5:8
Gli1 mouse models - Vismedegib treatment
Mouse genotype	Treatment			Comments/observations	Mouse ID
Gli1crehet-Tomatohet-PtchCondhomo	TAM at 8 weeks (2x3mg ip.); VISMO from 15.5 weeks daily for a week (50mg/kg ip.)			TD: De novo HFs / regressed BCC growth; pre-existing HFs: regressed BCC growth	XS 165:1
Gli1crehet-Tomatohet-PtchCondhomo	TAM at 8 weeks (2x3mg ip.); VISMO from 13 weeks daily for a week (50mg/kg ip.)			TD: De novo HFs / regressed BCC growth; pre-existing HFs: regressed BCC growth	MK 328:1
Gli1crehet-Tomatohet-PtchCondhomo	TAM at 8 weeks (2x3mg ip.); VISMO from 13 weeks daily for a week (50mg/kg ip.)			TD: De novo HFs / regressed BCC growth; pre-existing HFs: regressed BCC growth	MK 333:7
Gli1crehet-PtchCondhomo	TAM at 8 weeks (2x3mg ip.); VISMO from 14 weeks daily for a week (50mg/kg ip.)			TD: De novo HFs / regressed BCC growth; pre-existing HFs: regressed BCC growth	XS 170:1
Gli1crehet-Tomatohet-PtchCondhet	TAM at 8 weeks (2x3mg ip.); VISMO from 15.5 weeks daily for a week (50mg/kg ip.)			No obvious difference to wt skin	MK 321:3
Gli1crehet-PtchCondhet	TAM at 8 weeks (2x3mg ip.); VISMO from 14 weeks daily for a week (50mg/kg ip.)			No obvious difference to wt skin	SM 152:6
Tomatohet-PtchCondhet	TAM at 8 weeks (2x3mg ip.); VISMO from 13 weeks daily for a week (50mg/kg ip.)			No obvious difference to wt skin	MK 333:8
Lgr6 mouse models
Mouse genotype	Treatment	Analysis timepoint post Tamoxifen (TAM)	Tissue sampling (biopsy or final material)	Comments/observations	Mouse ID
Lgr6het-Tomatohet-PtchCondhomo-Rainbowhet	TAM at 8 weeks (2x3mg ip.)	9wk - 63d	final	BCCs in TD and HF, IFE proliferations	MK 128:3
Lgr6het-Tomatohet-PtchCondhomo	TAM at 8 weeks (2x3mg ip.)	9wk - 65d	final	BCCs in TD and HF, IFE proliferations	MK 155:4
Lgr6het-Tomatohet-PtchCondhomo	TAM at 8 weeks (2x3mg ip.)	9wk - 63d	final	BCCs in TD and HF	MK 213:4
Lgr6het-Tomatohet-PtchCondhomo	TAM at 8 weeks (2x3mg ip.)	9wk - 63d	final	BCCs in TD and HF	MK 213:6
Lgr6het-Tomatohet-PtchCondhomo	TAM at 8 weeks (2x3mg ip.)	9wk - 63d	final	BCCs in TD and HF	MK 213:2
Lgr6het-Tomatohet-PtchCondhet	TAM at 8 weeks (2x3mg ip.)	9wk - 65d	final	No obvious difference to wt skin	MK 128:2
Tomatohet-PtchCondhomo	TAM at 8 weeks (2x3mg ip.)	9wk - 63d	final	No obvious difference to wt skin	MK 213:1
Tomatohet-PtchCondhet-Rainbowhet	TAM at 8 weeks (2x3mg ip.)	9wk - 64d	final	No obvious difference to wt skin	MK 128:1
Lgr6het-Tomatohet-PtchCondhomo	TAM at 8 weeks (2x3mg ip.)	6wk - 40d	biopsy	BCCs in TD and HF, IFE proliferations	MK 247:5
Lgr6het-Tomatohet-PtchCondhomo	TAM at 8 weeks (2x3mg ip.)	6wk - 40d	final	BCCs in TD and HF	MK 246:6
Lgr6het-Tomatohet-PtchCondhomo-Rainbowhet	TAM at 8 weeks (2x3mg ip.)	5wk - 35d	biopsy	BCCs in TD and HF, IFE proliferations	MK 128:3
Lgr6het-Tomatohet-PtchCondhomo-Rainbowhet	TAM at 8 weeks (2x3mg ip.)	5wk - 31d	biopsy	BCCs in TD and HF, IFE proliferations	MK 129:2
Lgr6het-Tomatohet-PtchCondhomo	TAM at 8 weeks (2x3mg ip.)	5wk - 35d	biopsy	BCCs in TD and HF, IFE proliferations	MK 155:4
Lgr6het-Tomatohet-PtchCondhomo	TAM at 8 weeks (2x3mg ip.)	5wk - 37d	biopsy	BCCs in TD and HF, IFE proliferations	MK 213:2
Lgr6het-Tomatohet-PtchCondhomo	TAM at 8 weeks (2x3mg ip.)	5wk - 37d	biopsy	BCCs in TD and HF, IFE proliferations	MK 213:6
Lgr6het-Tomatohet-PtchCondhomo	TAM at 8 weeks (2x3mg ip.)	5wk - 35d	biopsy	BCCs in TD and HF	MK 213:4
Lgr6het-Tomatohet-PtchCondhet	TAM at 8 weeks (2x3mg ip.)	6wk - 40d	biopsy	No obvious difference to wt skin	MK 246:7
Lgr6het-Tomatohet-PtchCondhet	TAM at 8 weeks (2x3mg ip.)	6wk - 40d	biopsy	No obvious difference to wt skin	MK 247:3
Lgr6het-Tomatohet-PtchCondhet	TAM at 8 weeks (2x3mg ip.)	6wk - 40d	biopsy	No obvious difference to wt skin	MK 247:4
Lgr6het-Tomatohet-PtchCondhet	TAM at 8 weeks (2x3mg ip.)	6wk - 40d	final	No obvious difference to wt skin	MK 247:2
Lgr6het-Tomatohet-PtchCondhet-Rainbowhet	TAM at 8 weeks (2x3mg ip.)	5wk - 32d	biopsy	No obvious difference to wt skin	MK 129:3
Lgr6het-Tomatohet-PtchCondhet	TAM at 8 weeks (2x3mg ip.)	5wk - 35d	biopsy	No obvious difference to wt skin	MK 128:2
Tomatohet-PtchCondhet	TAM at 8 weeks (2x3mg ip.)	6wk - 40d	final	No obvious difference to wt skin	MK 247:1
Tomatohet-PtchCondhomo	TAM at 8 weeks (2x3mg ip.)	5wk - 35d	biopsy	No obvious difference to wt skin	MK 213:1
Lgr6het-Tomatohet-PtchCondhomo-Rainbowhet	TAM at 8 weeks (2x3mg ip.)	10d	biopsy	No obvious difference to wt skin	MK 128:3
Lgr6het-Tomatohet-PtchCondhomo-Rainbowhet	TAM at 8 weeks (2x3mg ip.)	10d	biopsy	No obvious difference to wt skin	MK 129:2
Lgr6het-Tomatohet-PtchCondhomo	TAM at 8 weeks (2x3mg ip.)	10d	biopsy	No obvious difference to wt skin	MK 155:4
Lgr6het-Tomatohet-PtchCondhomo	TAM at 8 weeks (2x3mg ip.)	10d	biopsy	No obvious difference to wt skin	MK 213:2
Lgr6het-Tomatohet-PtchCondhomo	TAM at 8 weeks (2x3mg ip.)	10d	biopsy	No obvious difference to wt skin	MK 213:4
Lgr6het-Tomatohet-PtchCondhomo	TAM at 8 weeks (2x3mg ip.)	10d	biopsy	No obvious difference to wt skin	MK 213:6
Lgr6het-Tomatohet-PtchCondhomo	TAM at 8 weeks (2x3mg ip.)	10d	final	No obvious difference to wt skin	MK 246:1
Lgr6het-Tomatohet-PtchCondhomo	TAM at 8 weeks (2x3mg ip.)	10d	biopsy	No obvious difference to wt skin	MK 246:6
Lgr6het-Tomatohet-PtchCondhomo	TAM at 8 weeks (2x3mg ip.)	10d	biopsy	No obvious difference to wt skin	MK 246:8
Lgr6het-Tomatohet-PtchCondhomo	TAM at 8 weeks (2x3mg ip.)	10d	biopsy	No obvious difference to wt skin	MK 247:5
Lgr6het-Tomatohet-PtchCondhet-Rainbowhet	TAM at 8 weeks (2x3mg ip.)	10d	biopsy	No obvious difference to wt skin	MK 129:3
Lgr6het-Tomatohet-PtchCondhet-Rainbowhet	non-TAM-treated control	10d	biopsy	No obvious difference to wt skin	MK 128:5
Lgr6het-Tomatohet-PtchCondhet	TAM at 8 weeks (2x3mg ip.)	10d	biopsy	No obvious difference to wt skin	MK 128:2
Lgr6het-Tomatohet-PtchCondhet	TAM at 8 weeks (2x3mg ip.)	10d	biopsy	No obvious difference to wt skin	MK 129:1
Lgr6het-Tomatohet-PtchCondhet	TAM at 8 weeks (2x3mg ip.)	10d	final	No obvious difference to wt skin	MK 246:5
Lgr6het-Tomatohet-PtchCondhet	TAM at 8 weeks (2x3mg ip.)	10d	biopsy	No obvious difference to wt skin	MK 246:7
Lgr6het-Tomatohet-PtchCondhet	TAM at 8 weeks (2x3mg ip.)	10d	biopsy	No obvious difference to wt skin	MK 247:2
Lgr6het-Tomatohet-PtchCondhet	TAM at 8 weeks (2x3mg ip.)	10d	biopsy	No obvious difference to wt skin	MK 247:3
Lgr6het-Tomatohet-PtchCondhet	TAM at 8 weeks (2x3mg ip.)	10d	biopsy	No obvious difference to wt skin	MK 247:4
Tomatohet-PtchCondhomo	TAM at 8 weeks (2x3mg ip.)	10d	biopsy	No obvious difference to wt skin	MK 213:1
Tomatohet-PtchCondhomo	TAM at 8 weeks (2x3mg ip.)	10d	final	No obvious difference to wt skin	MK 246:3
Tomatohet-PtchCondhet-Rainbowhet	TAM at 8 weeks (2x3mg ip.)	10d	biopsy	No obvious difference to wt skin	MK 128:1
Tomatohet-PtchCondhet-Rainbowhet	TAM at 8 weeks (2x3mg ip.)	10d	biopsy	No obvious difference to wt skin	MK 129:4
Tomatohet-PtchCondhet	non-TAM-treated control	10d	final	No obvious difference to wt skin	MK 246:2
Tomatohet-PtchCondhet	TAM at 8 weeks (2x3mg ip.)	10d	biopsy	No obvious difference to wt skin	MK 247:1
Tomatohet-PtchCondhet	TAM at 8 weeks (2x3mg ip.)	10d	biopsy	No obvious difference to wt skin	MK 247:6
Lgr6het-Tomatohet-PtchCondhomo-Rainbowhet	TAM at 8 weeks (2x3mg ip.)	10wk - 73d	final	BCCs in TD and HF, IFE proliferations	MK 129:2
Lgr6het-Tomatohet-PtchCondhomo	TAM at 8 weeks (2x3mg ip.)	10wk - 72d	final	BCCs in TD and HF, IFE proliferations	MK 247:5
Lgr6het-Tomatohet-PtchCondhomo	TAM at 8 weeks (2x3mg ip.)	10wk - 70d	final	BCCs in TD and HF, IFE proliferations	MK 246:8
Lgr6het-Tomatohet-PtchCondhet-Rainbowhet	TAM at 8 weeks (2x3mg ip.)	10wk - 74d	final	No obvious difference to wt skin	MK 129:3
Lgr6het-Tomatohet-PtchCondhet	TAM at 8 weeks (2x3mg ip.)	10wk - 75d	final	No obvious difference to wt skin	MK 129:1
Lgr6het-Tomatohet-PtchCondhet	TAM at 8 weeks (2x3mg ip.)	10wk - 73d	final	No obvious difference to wt skin	MK 247:3
Lgr6het-Tomatohet-PtchCondhet	TAM at 8 weeks (2x3mg ip.)	10wk - 73d	final	No obvious difference to wt skin	MK 247:4
Lgr6het-Tomatohet-PtchCondhet	TAM at 8 weeks (2x3mg ip.)	10wk - 70d	final	No obvious difference to wt skin	MK 246:7
Tomatohet-PtchCondhet-Rainbowhet	TAM at 8 weeks (2x3mg ip.)	10wk - 76d	final	No obvious difference to wt skin	MK 129:4
Tomatohet-PtchCondhet	TAM at 8 weeks (2x3mg ip.)	10wk - 70d	final	No obvious difference to wt skin	MK 247:6
Lgr6het-Tomatohet-PtchCondhomo	non-TAM-treated control	3wk	final	No obvious difference to wt skin	MK 244:1
Lgr6het-Tomatohet-PtchCondhomo	non-TAM-treated control	3wk	final	No obvious difference to wt skin	MK 244:3
Tomatohet-PtchCondhet	non-TAM-treated control	3wk	final	No obvious difference to wt skin	MK 244:2
Tomatohet-PtchCondhet	non-TAM-treated control	3wk	final	No obvious difference to wt skin	MK 244:4
Col1a2 mouse models
Mouse genotype	Treatment	Analysis timepoint post Tamoxifen (TAM)	Tissue sampling (biopsy or final material)	Comments/observations	Mouse ID
Colcrehet-Tomatohet-PtchCondhomo	TAM at 8 weeks (2x0.75mg topical)	9wk - 60d	final	Big condensates found: under IFE, near the infudibulum of all guard HFs and some zig-zag HFs; Dense dermal cells accumulated in the proximty of TD stroma.	MK 280:6
Colcrehet-Tomatohet-PtchCondhomo	TAM at 8 weeks (1x3mg ip.)	8wk - 58d	final	At some places cells accumulate under IFE. Papillary dermis seems looser than normal skin. Also observed: HFs with non-connected or de-integrated DP.	MK 272:9
Colcrehet-Tomatohet-PtchCondhomo	TAM at 8 weeks (1x3mg ip.)	8wk - 57d	final	At some places cells accumulate under HF infundibulum (Gu HF). Also observed: HFs with non-connected or de-integrated DP.	MK 272:6
Colcrehet-Tomatohet-PtchCondhomo	TAM at 8 weeks (1x3mg ip.)	7wk - 50d	biopsy	At some places cells accumulate under IFE or appear more dense; No TDs were sampled.	MK 272:9
Colcrehet-Tomatohet-PtchCondhet	TAM at 8 weeks (1x3mg ip.)	8wk - 57d	final	No obvious difference to wt skin	MK 272:8
Colcrehet-Tomatohet-PtchCondhet	TAM at 8 weeks (2x0.75mg topical)	9wk - 60d	final	No obvious difference to wt skin	MK 280:2
Colcrehet-Tomatohet-PtchCondhet	TAM at 8 weeks (2x3mg ip.)	9wk - 64d	final	No obvious difference to wt skin	MK 270:2
Colcrehet-Tomatohet-PtchCondhet	non-TAM-treated control	9wk - 64d	final	No obvious difference to wt skin	MK 270:5
Tomatohet-PtchCondhet	TAM at 8 weeks (2x0.75mg topical)	9wk - 60d	final	No obvious difference to wt skin	MK 280:5
Tomatohet-PtchCondhet	TAM at 8 weeks (1x3mg ip.)	8wk - 58d	final	No obvious difference to wt skin	MK 272:7
Tomatohet-PtchCondhet	TAM at 8 weeks (2x3mg ip.)	9wk - 64d	final	No obvious difference to wt skin	MK 270:3
Colcrehet-Tomatohet-PtchCondhomo	TAM at 8 weeks (2x0.75mg topical)	6wk - 41d	final	Condensates in some HF infundibula and under IFE; Dermal cells accumulated in the proximity of TD stroma	MK 280:8
Colcrehet-Tomatohet-PtchCondhomo	TAM at 8 weeks (2x0.75mg topical)	6wk - 41d	final	Dermal condensates under IFE, no TD sampled	MK 304:1
Colcrehet-Tomatohet-PtchCondhomo	TAM at 8 weeks (2x0.75mg topical)	6wk - 41d	final	Dermal condensates in some HF infundibula and under IFE	MK 304:2
Colcrehet-Tomatohomo-PtchCondhomo	TAM at 8 weeks (2x0.75mg topical)	6wk - 40d	final	Dermal condensates in some HF infundibula and under IFE	MK 276:2
Colcrehet-Tomatohet-PtchCondhomo	TAM at 8 weeks (2x0.75mg topical)	6wk - 40d	final	Dermal condensates in some HF infundibula and under IFE	MK 280:4
Colcrehet-Tomatohomo-PtchCondhomo	non-TAM-treated control; p14wk	6wk - 41d	final	Some dermal condensates in some HF infundibula and under IFE	MK 280:1
Colcrehet-Tomatohet-PtchCondhomo	non-TAM-treated control (acteton only)	6wk - 40d	final	Mostly no obvious difference to wt skin except for skin being in anagen stage, some HFs have an enlarged infundibulum.	MK 303:9
Colcrehet-Tomatohet-PtchCondhomo	TAM at 8 weeks (1x3mg ip.)	5wk - 35d	biopsy	At some places cells accumulate under IFE. Some guard HF with apparent condensations, other guard HFs wt phenotype	MK 272:6
Colcrehet-Tomatohet-PtchCondhomo	TAM at 8 weeks (2x0.75mg topical)	5wk - 35d	final	Dermal clusters were found near the guard HF infundibulum. Also observed: HFs with non-connected or de-integrated DP.	MK 297:5
Colcrehet-Tomatohet-PtchCondhet	TAM at 8 weeks (2x0.75mg topical)	6wk - 40d	final	No obvious difference to wt skin	MK 276:5
Colcrehet-Tomatohet-PtchCondhet	TAM at 8 weeks (2x0.75mg topical)	6wk - 40d	final	No obvious difference to wt skin	MK 280:3
Colcrehet-Tomatohet-PtchCondhet	non-TAM-treated control (acteton only)	6wk - 40d	final	No obvious difference to wt skin	MK 303:8
Colcrehet-Tomatohet-PtchCondhet	TAM at 8 weeks (2x3mg ip.)	5wk - 35d	biopsy	No obvious difference to wt skin	MK 270:2
Colcrehet-Tomatohet-PtchCondhet	non-TAM-treated control	5wk - 35d	biopsy	No obvious difference to wt skin	MK 270:5
Colcrehet-Tomatohet-PtchCondhet	TAM at 8 weeks (1x3mg ip.)	5wk - 35d	biopsy	No obvious difference to wt skin	MK 272:8
Colcrehet-Tomatohet-PtchCondhet	TAM at 8 weeks (2x0.75mg topical)	5wk - 35d	final	No obvious difference to wt skin	MK 297:6
Tomatohomo-PtchCondhet	TAM at 8 weeks (2x0.75mg topical)	6wk - 40d	final	No obvious difference to wt skin	MK 276:1
Tomatohet-PtchCondhomo	TAM at 8 weeks (2x0.75mg topical)	6wk - 40d	final	No obvious difference to wt skin	MK 280:7
Tomatohet-PtchCondhet	non-TAM-treated control (acteton only)	6wk - 40d	final	No obvious difference to wt skin	MK 303:10
Tomatohet-PtchCondhet	TAM at 8 weeks (2x3mg ip.)	5wk - 35d	biopsy	No obvious difference to wt skin	MK 270:3
Tomatohet-PtchCondhet	TAM at 8 weeks (1x3mg ip.)	5wk - 35d	biopsy	No obvious difference to wt skin	MK 272:7
Tomatohet-PtchCondhet	TAM at 8 weeks (2x0.75mg topical)	5wk - 35d	final	No obvious difference to wt skin	MK 297:3
Colcrehet-Tomatohet-PtchCondhomo	TAM at 8 weeks (1x3mg ip.)	10d	biopsy	Non-synchronized hair stages, hair follicles appear normal; TDs: some guard HF with appearing condensations, other guard HFs wt phenotype.	MK 272:6
Colcrehet-Tomatohet-PtchCondhomo	TAM at 8 weeks (1x3mg ip.)	10d	biopsy	No obvious difference to wt skin	MK 272:9
Colcrehet-Tomatohet-PtchCondhomo	TAM at 8 weeks (2x0.75mg topical)	10d	biopsy	No obvious difference to wt skin; No TDs/Gu HFs were sampled.	MK 297:5
Colcrehet-Tomatohet-PtchCondhomo	TAM at 8 weeks (2x0.75mg topical)	10d	final	Condensates were found near the infudibulum of all analyzed guard HFs.	MK 297:1
Colcrehet-Tomatohet-PtchCondhet	TAM at 8 weeks (1x3mg ip.)	10d	biopsy	No obvious difference to wt skin	MK 272:8
Colcrehet-Tomatohet-PtchCondhet	TAM at 8 weeks (2x0.75mg topical)	10d	final	No obvious difference to wt skin	MK 297:4
Colcrehet-Tomatohet-PtchCondhet	TAM at 8 weeks (2x0.75mg topical)	10d	biopsy	No obvious difference to wt skin	MK 297:6
Tomatohet-PtchCondhet	TAM at 8 weeks (1x3mg ip.)	10d	biopsy	No obvious difference to wt skin	MK 272:7
Tomatohet-PtchCondhet	TAM at 8 weeks (2x0.75mg topical)	10d	final	No obvious difference to wt skin	MK 297:2
Colcrehet-Tomatohet-PtchCondhomo	TAM at 8 weeks (1x3mg ip.)	28d	biopsy	Sample was very small. No obvious difference to wt skin; No TDs were sampled	MK 272:9
Colcrehet-Tomatohomo-PtchCondhomo	TAM at 8 weeks (2x0.75mg topical)	27d	final	Non-synchronized hair stages, hair follicles appear normal; No TDs were sampled	MK 276:3
Colcrehet-Tomatohet-PtchCondhomo	TAM at 8 weeks (2x0.75mg topical)	26d	biopsy	Non-synchronized hair stages, dermal condensates under IFE, some HFs have an enlarged infundibulum.	MK 301:8
Colcrehet-Tomatohet-PtchCondhomo	TAM at p21 (1x1mg ip.)	24d	final	Non-synchronized hair stages, hair follicles appear normal	MK 277:7
Colcrehet-Tomatohet-PtchCondhomo	TAM at p21 (1x1mg ip.)	21d	final	No obvious difference to wt skin	MK 277:2
Colcrehet-Tomatohomo-PtchCondhomo	TAM at p21 (1x1mg ip.)	21d	final	No obvious difference to wt skin	MK 277:3
Colcrehet-Tomatohet-PtchCondhomo	TAM at 8 weeks (2x0.75mg topical)	20d	final	No obvious difference to wt skin	MK 301:4
Colcrehet-Tomatohet-PtchCondhomo	TAM at 8 weeks (2x0.75mg topical)	19d	biopsy	Sample was very small. No obvious difference to wt skin; No TDs were sampled	MK 280:4
Colcrehet-Tomatohet-PtchCondhomo	TAM at 8 weeks (2x0.75mg topical)	19d	biopsy	Sample was very small. No obvious difference to wt skin; No TDs were sampled	MK 280:6
Colcrehet-Tomatohet-PtchCondhomo	TAM at 8 weeks (1x3mg ip.)	17d	biopsy	messy hair stages, all hair follicles seems normal though	MK 272:6
Colcrehet-Tomatohet-PtchCondhomo	TAM at 8 weeks (2x0.75mg topical)	14d	final	No obvious difference to wt skin	MK 303:7
Colcrehet-Tomatohomo-PtchCondhomo	non-TAM-treated control; p11wk	19d	biopsy	No obvious difference to wt skin	MK 280:1
Colcrehet-Tomatohet-PtchCondhomo	non-TAM-treated control (acteton only); P11wk	16d	biopsy	No obvious difference to wt skin	MK 304:5
Colcrehet-Tomatohet-PtchCondhet	TAM at 8 weeks (2x0.75mg topical)	27d	final	No obvious difference to wt skin	MK 275:3
Colcrehet-Tomatohet-PtchCondhet	TAM at p21 (1x1mg ip.)	24d	final	Non-synchronized hair stages, hair follicles appear normal	MK 277:8
Colcrehet-Tomatohomo-PtchCondhet	TAM at p21 (1x1mg ip.)	21d	final	No obvious difference to wt skin	MK 277:1
Colcrehet-Tomatohet-PtchCondhet	TAM at p21 (1x1mg ip.)	21d	final	No obvious difference to wt skin	MK 277:5
Colcrehet-Tomatohet-PtchCondhet	TAM at 8 weeks (2x0.75mg topical)	20d	final	No obvious difference to wt skin	MK 301:1
Tomatohet-PtchCondhomo	TAM at 8 weeks (2x3mg ip.)	27d	biopsy	No obvious difference to wt skin	MK 302:1
Tomatohet-PtchCondhet	TAM at 8 weeks (2x0.75mg topical)	27d	final	No obvious difference to wt skin	MK 276:4
Tomatohet-PtchCondhomo	TAM at p21 (1x1mg ip.)	24d	final	No obvious difference to wt skin	MK 277:6
Colcrehet-Tomatohet-PtchCondhomo	non-TAM-treated control (acteton only); P8wk	1d	final	No obvious difference to wt skin	MK 304:5
Colcrehet-Tomatohet-PtchCondhomo	non-TAM-treated control (acteton only); P8wk	1d	final	No obvious difference to wt skin	MK 304:7
Colcrehet-Tomatohomo-PtchCondhomo	non-TAM-treated control; p8wk	1d	final	No obvious difference to wt skin	MK 276:8
Colcrehet-Tomatohet-PtchCondhet	non-TAM-treated control (acteton only); P8wk	1d	biopsy	No obvious difference to wt skin	MK 303:8
Tomatohet-PtchCondhet	non-TAM-treated control (acteton only); P8wk	1d	biopsy	No obvious difference to wt skin	MK 303:10
Tomatohet-PtchCondhet	non-TAM-treated control (acteton only); P8wk	1d	biopsy	No obvious difference to wt skin	MK 304:6
